# Supplementary material for: A base-catalyzed domino reaction between isoindigos and α-alkylidene succinimides—convenient preparation of highly steric bispirooxindoles
Source: Royal Society of Chemistry journal article supplement (doi:10.1039/d0ob01858a), 2020-01-01

## Supplementary Information

# Base catalyzed domino reaction between isoindigos and $\alpha$ -alkylidene succinimides—convenient preparation of highly steric bispirooxindoles

Chen-Yi Li,<sup>a,b</sup> Min Xiang,<sup>a,b</sup> Xiang-Jia Song,<sup>a,b</sup> Ying Zou,<sup>a,b</sup> Zhi-Cheng Huang,<sup>a,b</sup> Xia Li,<sup>a,b</sup> Fang Tian<sup>a\*</sup> and Li-Xin Wang<sup>a\*</sup>

<sup>a</sup> Key Laboratory of Asymmetric Synthesis and Chirrotechnology of Sichuan Province, Chengdu Institute of Organic Chemistry, Chinese Academy of Sciences, Chengdu 610041, China

<sup>b</sup> University of Chinese Academy of Sciences, Beijing 100049, China

E-mail: wlxioc@cioc.ac.cn

## Table of Contents

|                                                                                   |        |
|-----------------------------------------------------------------------------------|--------|
| 1. General information                                                            | S2     |
| 2. General procedure for the syntheses of <b>1</b> and <b>2</b>                   | S2     |
| 3. General procedure for the synthesis of <b>3</b>                                | S2     |
| 4. Scheme <b>S1</b> : catalytic asymmetric synthesis of the product               | S3     |
| 5. The data of the products                                                       | S4-16  |
| 6. The copies of <sup>1</sup> H NMR and <sup>13</sup> C NMR spectra for compounds | S17-48 |

## 1. General Information

Commercial grade solvent was dried and purified by standard procedures as specified in Purification of Laboratory Chemicals.  $^1\text{H}$  NMR and  $^{13}\text{C}$  NMR spectra were recorded on a Bruker Avance (600 400 and 300MHz for  $^1\text{H}$  NMR, 150 100 and 75 MHz for  $^{13}\text{C}$  NMR) instrument. Data for  $^1\text{H}$  NMR are reported as chemical shift (ppm, tetramethylsilane as the internal standard), integration, multiplicity (s = singlet, d = doublet, t = triplet, q = quartet, m = multiplet), coupling constant (Hz). Data for  $^{13}\text{C}$  NMR are reported as chemical shift. High resolution mass spectra were obtained with Thermo Scientific LTQ Orbitrap XL mass spectrometer. Flash column chromatography was carried out using silica gel eluting with ethyl acetate and petroleum ether. Reactions were monitored by TLC and visualized with ultraviolet light. Melting points were recorded on a Buchi Melting Point B-545.

## 2. General Procedure for the Syntheses of Reactants 1 and 2.

Isoindigos<sup>1</sup> and  $\alpha$ -alkylidene<sup>2</sup> were prepared as reported procedures. Unless otherwise noted, materials were purchased from commercial suppliers and used without further purification.

## 3. General procedure for the synthesis of 3

A mixture of 0.1 mmol **1**, 0.12 mmol **2** and 20 mol%  $\text{Cs}_2\text{CO}_3$  in 1 ml THF was stirred at room temperature. After the reaction was completed by TLC, the crude product was directly purified by silica gel chromatography to give the desired product **3**.

### references:

- 1 Y.-Y. Gui, J. Yang, L.-W. Qi, X. Wang, F. Tian, X.-N. Li, L. Peng and L.-X. Wang, *Org. Biomol. Chem.*, 2015, **13**, 6371.
2. M. Wang, H.-J. Liu, Y.-T. Fan, Y.-Y. Yang, Z.-Y. Jiang, and C.-H. Tan\* *Chem. Eur. J.*, 2010, **16**, 12534-12537.

#### 4. The data of the products

Scheme 1 catalytic asymmetric synthesis of the product

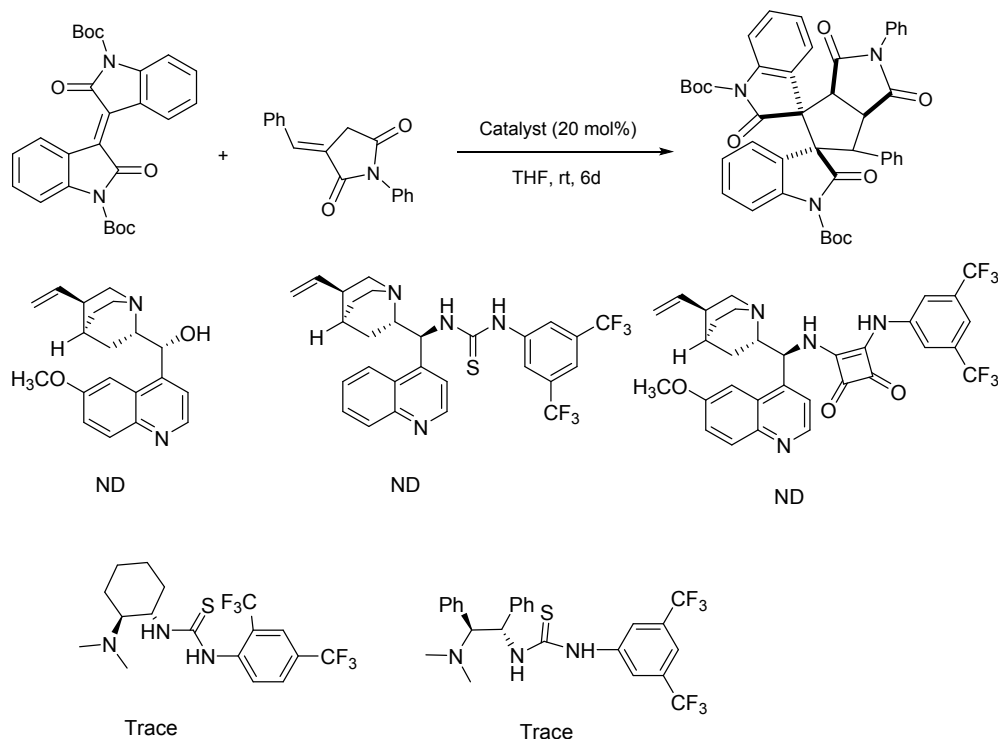

#### 5. The data of the products

**Di-tert-butyl(3*R*,3*a'*S,5*S*,6*a'*S)-1',2,2'',3'-tetraoxo-2',6'-diphenyl-1',2',3',3*a'*,6',6*a'*-hexahydrodispiro[indoline-3,4'-cyclopenta[c]pyrrole-5',3''-indoline]-1,1''-dicarboxylate (3a)**

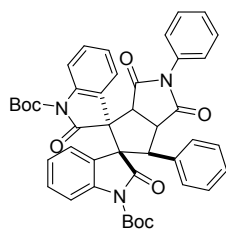

white solid, Mp: 245.1-246.2 °C, 92% yield, dr > 20:1;

<sup>1</sup>H NMR (400 MHz, CDCl<sub>3</sub>) δ 7.57-7.52 (m, 3H), 7.48-7.42 (m, 2H), 7.41-7.36 (m, 3H), 7.33 (d, *J* = 8.2 Hz, 1H), 7.22 (d, *J* = 7.6 Hz, 1H), 7.18, *J* = 9.6 Hz, 2H), 7.13 (m *J* = 7.0, 4.3 Hz, 4H), 7.10-7.05 (m, 2H), 4.96 (d, *J* = 9.6 Hz, 1H), 4.77 (t, *J* = 9.8 Hz, 1H), 4.62 (d, *J* = 10.1 Hz, 1H), 1.62 (s, 9H), 1.53 (s, 9H);

<sup>13</sup>C NMR (100MHz, CDCl<sub>3</sub>) δ 176.1, 175.3, 175.2, 173.5, 147.9, 147.8, 139.8, 139.8, 134.2, 132.1, 129.9, 129.0, 128.7, 128.6, 128.4, 127.7, 127.0, 124.8, 124.4, 124.1, 123.8, 123.6, 122.1, 115.0, 114.9, 84.8, 84.6, 70.6, 62.5, 60.3, 51.4, 51.3, 48.0, 28.1, 28.0;

HRMS (ESI) *m/z* calcd for C<sub>43</sub>H<sub>39</sub>N<sub>3</sub>O<sub>8</sub>Na<sup>+</sup> (M+Na)<sup>+</sup> 748.2629, found 748.2627.

**Di-tert-butyl(3*R*,3*a'*S,5*S*,6*a'*S)-5,5''-dichloro-1',2,2'',3'-tetraoxo-2',6'-diphenyl-1',2',3',3*a'*,6',6*a'*-hexahydrodispiro[indoline-3,4'-cyclopenta[c]pyrrole-5',3''-indoline]-1,1''-dicarboxylate (3b)**

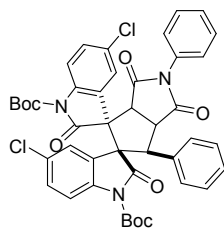

white solid, Mp: 229.1-230.8 °C, 85% yield, dr > 20:1;

**<sup>1</sup>H NMR** (300 MHz, CDCl<sub>3</sub>) δ 7.63 (d, *J* = 8.8 Hz, 1H), 7.52 (dd, *J* = 6.3, 1.9 Hz, 3H), 7.49-7.44 (m, 3H), 7.38 (dd, *J* = 13.0, 3.5 Hz, 3H), 7.24-7.21 (m, 1H), 7.19-7.13 (m, 5H), 4.91 (d, *J* = 9.5 Hz, 1H), 4.73 (t, *J* = 9.8 Hz, 1H), 4.58 (d, *J* = 10.1 Hz, 1H), 1.66 (s, 9H), 1.58 (s, 9H);

**<sup>13</sup>C NMR** (75 MHz, CDCl<sub>3</sub>) δ 175.7, 174.8, 174.4, 172.5, 147.8, 147.7, 138.4, 138.3, 133.5, 131.9, 130.3, 130.2, 129.1, 129.1, 129.33, 128.99, 129.0, 128.7, 128.9, 128.5, 128.6, 128.6, 128.1, 126.9, 126.4, 125.2, 124.5, 123.9, 123.7, 116.4, 116.2, 85.7, 85.5, 70.2, 62.0, 51.9, 51.6, 47.8, 28.0, 27.9;

**HRMS** (ESI) *m/z* calcd for C<sub>43</sub>H<sub>37</sub>Cl<sub>2</sub>N<sub>3</sub>O<sub>8</sub>Na<sup>+</sup> (*M*+Na)<sup>+</sup> 816.1849, found 816.1849.

**Di-tert-butyl(3R,3a'S,5'S,6a'S)-5,5''-difluoro-1',2,2'',3'-tetraoxo-2',6'-diphenyl-1',2',3',3a',6',6a'-hexahydrodispiro[indoline-3,4'-cyclopenta[c]pyrrole-5',3''-indoline]-1,1''-dicarboxylate (3ca)**

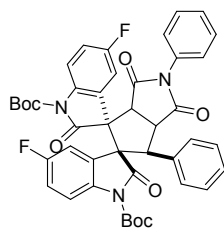

white solid, Mp: 251.7-252.6 °C, 85% yield, dr > 20:1;

**<sup>1</sup>H NMR** (400 MHz, CDCl<sub>3</sub>) δ 7.65 (dd, *J* = 9.0, 4.6 Hz, 1H), 7.49-7.34 (m, 6H), 7.31-7.27 (m, 2H), 7.17 (s, 5H), 6.92 (m, 2H), 4.90 (d, *J* = 9.6 Hz, 1H), 4.74 (t, *J* = 9.8 Hz, 1H), 4.56 (d, *J* = 10.1 Hz, 1H), 1.64 (s, 9H), 1.56 (s, 9H);

**<sup>13</sup>C NMR** (100 MHz, CDCl<sub>3</sub>) δ 175.7, 174.8, 172.9, 161.0 (d, *J* = 18.4 Hz), 147.8 (d, *J* = 9.0 Hz), 147.8, 135.8, 134.7 (d, *J* = 223.6 Hz), 133.6, 131.9, 129.1, 128.9, 128.6, 128.1, 126.9, 125.2 (d, *J* = 8.2 Hz), 123.7 (d, *J* = 8.2 Hz), 116.9, 116.8, 116.1, 112.0, 111.8, 111.5, 111.2, 85.5, 85.3, 70.4, 62.2, 51.8, 51.5, 47.9, 27.9, 27.8;

**HRMS** (ESI) *m/z* calcd for C<sub>43</sub>H<sub>37</sub>F<sub>2</sub>N<sub>3</sub>O<sub>8</sub>Na<sup>+</sup> (*M*+Na)<sup>+</sup> 784.2440, found 784.2442.

**Di-tert-butyl(3R,3a'S,5'S,6a'S)-5,5''-dimethyl-1',2,2'',3'-tetraoxo-2',6'-diphenyl-1',2',3',3a',6',6a'-hexahydrodispiro[indoline-3,4'-cyclopenta[c]pyrrole-5',3''-indoline]-1,1''-dicarboxylate (3da)**

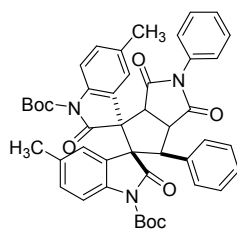

white solid, Mp: 247.1-248.3 °C, 90% yield, dr > 20:1;

**<sup>1</sup>H NMR** (400 MHz, CDCl<sub>3</sub>) δ 7.44 (d, *J* = 7.4 Hz, 2H), 7.38 (dd, *J* = 8.4, 5.9 Hz, 6H), 7.21 (d, *J* = 8.3 Hz, 1H), 7.14 (dd, *J* = 8.1, 5.3 Hz, 5H), 7.00 (d, *J* = 8.4 Hz, 1H), 6.94 (d, *J* = 8.2 Hz, 1H), 4.95 (d, *J* = 9.5 Hz, 1H), 4.74

(t, 1H), 4.60 (d,  $J = 10.1$  Hz, 1H), 2.30 (d,  $J = 5.2$  Hz, 6H), 1.62 (s, 9H), 1.53 (s, 9H);  
 $^{13}\text{C}$  NMR (100MHz,  $\text{CDCl}_3$ )  $\delta$  176.2, 175.6, 175.3, 173.7, 148.0, 147.9, 137.3, 134.5, 134.5, 134.2, 132.2,  
130.4, 130.3, 129.0, 128.7, 128.6, 128.3, 127.6, 127.1, 124.7, 124.3, 123.6, 122.2, 114.6, 114.5, 84.7,  
84.4, 77.3, 77.0, 76.7, 70.5, 62.5, 51.5, 51.4, 48.1, 28.1, 28.0, 21.1, 21.1;  
HRMS (ESI)  $m/z$  calcd for  $\text{C}_{45}\text{H}_{43}\text{N}_3\text{O}_8\text{Na}^+$  ( $\text{M}+\text{Na}$ ) $^+$  776.2942, found 776.2946.

**Di-tert-butyl(3R,3a'S,5'S,6a'S)-6,6''-dichloro-1',2,2'',3'-tetraoxo-2',6'-diphenyl-1',2',3',3a',6',6a'-hexahydrodispiro[indoline-3,4'-cyclopenta[c]pyrrole-5',3''-indoline]-1,1''-dicarboxylate (3ea)**

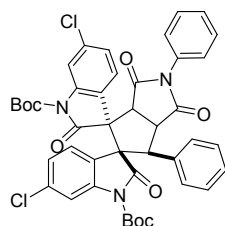

white solid, Mp: 265.2-266.4 °C, 83% yield, dr > 20:1;  
 $^1\text{H}$  NMR (400 MHz,  $\text{CDCl}_3$ )  $\delta$  7.54 (d,  $J = 7.1$  Hz, 3H), 7.49-7.43 (m, 2H), 7.36 (dd,  $J = 16.9, 7.8$  Hz, 4H),  
7.22 (m, 2H), 7.15 (t,  $J = 7.6$  Hz, 1H), 7.11-7.06 (m, 3H), 6.66 (d,  $J = 8.6$  Hz, 2H), 4.90 (d,  $J = 9.6$  Hz, 1H),  
4.71 (t,  $J = 9.8$  Hz, 1H), 4.60 (d,  $J = 10.0$  Hz, 1H), 3.69 (s, 3H), 1.62 (s, 9H), 1.54 (s, 9H);  
 $^{13}\text{C}$  NMR (100 MHz,  $\text{CDCl}_3$ )  $\delta$  175.7, 174.9, 174.8, 173.1, 147.5, 147.3, 140.7, 140.7, 136.11, 136.06, 133.5,  
131.9, 129.0, 128.7, 128.6, 128.1, 126.9, 125.2, 125.1, 124.7, 124.6, 122.0, 120.3, 116.0, 115.8, 85.7,  
85.5, 70.3, 61.9, 52.0, 51.5, 47.8, 28.0, 27.9;  
HRMS (ESI)  $m/z$  calcd for  $\text{C}_{43}\text{H}_{37}\text{Cl}_2\text{N}_3\text{O}_8\text{Na}^+$  ( $\text{M}+\text{Na}$ ) $^+$  816.1849, found 816.1847.

**Di-tert-butyl(3R,5'S,6'S)-5,5''-dimethoxy-1',2,2'',3'-tetraoxo-2',6'-diphenyl-1',2',3',3a',6',6a'-hexahydrodispiro[indoline-3,4'-cyclopenta[c]pyrrole-5',3''-indoline]-1,1''-dicarboxylate (3fa)**

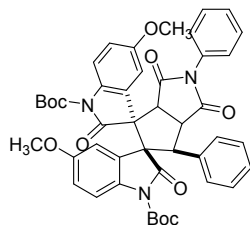

white solid, Mp: 258.2-259.4 °C, 85% yield, dr > 20:1;  
 $^1\text{H}$  NMR (600 MHz,  $\text{CDCl}_3$ )  $\delta$  7.46 (m, 3H), 7.38 (d,  $J = 7.8$  Hz, 3H), 7.29-7.25 (m, 1H), 7.19 (d,  $J = 3.2$  Hz,  
2H), 7.16-7.11 (m, 5H), 6.74 (dd,  $J = 8.9, 2.5$  Hz, 1H), 6.68 (dd,  $J = 8.9, 2.5$  Hz, 1H), 4.94 (d,  $J = 9.5$  Hz,  
1H), 4.76 (t,  $J = 9.8$  Hz, 1H), 4.60 (d,  $J = 10.1$  Hz, 1H), 3.79 (s, 3H), 3.77 (s, 3H), 1.61 (s, 9H), 1.52 (s, 9H).  
 $^{13}\text{C}$  NMR (150 MHz,  $\text{CDCl}_3$ )  $\delta$  176.1, 175.4, 175.2, 173.7, 157.0, 156.9, 148.0, 147.9, 134.3, 132.9, 132.9,  
132.1, 129.0, 128.7, 128.6, 128.4, 127.8, 127.1, 124.7 (s), 123.3, 116.0, 115.9, 115.1, 109.9, 109.4, 84.8,  
84.6, 70.8, 62.6, 55.5, 55.3, 51.5, 48.1, 27.9, 27.8.  
HRMS (ESI)  $m/z$  calcd for  $\text{C}_{45}\text{H}_{43}\text{N}_3\text{O}_{10}\text{Na}^+$  ( $\text{M}+\text{Na}$ ) $^+$  808.2846, found 808.2878.

**Di-tert-butyl(3R,5'S,6'S)-5,5''-dibromo-1',2,2'',3'-tetraoxo-2',6'-diphenyl-1',2',3',3a',6',6a'-hexahydrodispiro[indoline-3,4'-cyclopenta[c]pyrrole-5',3''-indoline]-1,1''-dicarboxylate (3ga)**

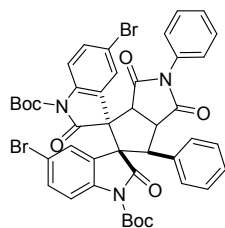

white solid, Mp: 265.2-266.8 °C, 90 % yield, dr > 20:1;

<sup>1</sup>H NMR (600 MHz, CDCl<sub>3</sub>) δ 7.82 (d, *J* = 1.7 Hz, 1H), 7.60 (d, *J* = 1.7 Hz, 1H), 7.45 (d, *J* = 7.8 Hz, 2H), 7.41–7.33 (m, 5H), 7.26 (d, *J* = 5.8 Hz, 1H), 7.23 (d, *J* = 1.7 Hz, 1H), 7.18–7.11 (m, 5H), 4.88 (d, *J* = 9.7 Hz, 1H), 4.71 (t, *J* = 9.9 Hz, 1H), 4.57 (d, *J* = 10.1 Hz, 1H), 1.64 (s, 9H), 1.54 (s, 9H).

<sup>13</sup>C NMR (150 MHz, CDCl<sub>3</sub>) δ 175.6, 174.8, 174.8, 173.0, 147.5, 147.3, 140.8, 140.7, 133.4, 131.9, 129.1, 128.7, 128.6, 128.1, 127.6, 126.9, 125.5, 124.9, 124.1, 124.1, 122.5, 120.8, 118.7, 85.8, 85.5, 77.5 (s), 77.0, 76.8, 70.3, 61.8, 52.0, 51.5, 47.7, 28.0, 27.9.

HRMS (ESI) *m/z* calcd for C<sub>43</sub>H<sub>37</sub>Br<sub>2</sub>N<sub>3</sub>O<sub>8</sub>Na<sup>+</sup> (M+Na)<sup>+</sup> 904.0845, found 904.0876.

**Di-tert-butyl(3R,3a'S,5'S,6a'S)-5,5''-dimethyl-2',6'-diphenyl-1,1''-ditosyl-6',6a''-dihydrodispiro[indoline-3,4'-cyclopenta[c]pyrrole-5',3''-indoline]-1',2,2'',3'(2'H,3a'H)-tetraone (3ha)**

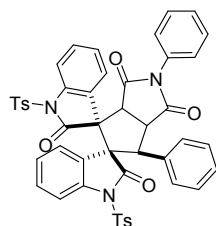

white solid, Mp: 290.1-291.7 °C, 82% yield, dr > 20:1;

<sup>1</sup>H NMR (600 MHz, CDCl<sub>3</sub>) δ 7.79 (d, *J* = 8.2 Hz, 2H), 7.72 (d, *J* = 8.2 Hz, 1H), 7.64 (d, *J* = 8.2 Hz, 2H), 7.58 (d, *J* = 7.3 Hz, 1H), 7.50 (d, *J* = 7.9 Hz, 1H), 7.41 (d, *J* = 7.1 Hz, 3H), 7.36 (d, *J* = 7.7 Hz, 1H), 7.24 (dd, *J* = 12.6, 8.4 Hz, 5H), 7.10 (d, *J* = 7.7 Hz, 2H), 7.04–7.00 (m, 3H), 6.96 (s, 1H), 6.83 (dd, *J* = 14.1, 7.3 Hz, 4H), 4.86 (d, *J* = 9.5 Hz, 1H), 4.54 (t, *J* = 9.8 Hz, 1H), 4.40 (d, *J* = 10.1 Hz, 1H), 2.49 (s, 3H), 2.26 (s, 3H).

<sup>13</sup>C NMR (150MHz, CDCl<sub>3</sub>) δ 175.6, 175.5, 173.9, 173.3, 145.9, 145.6, 139.2, 139.0, 134.8, 134.2, 133.1, 131.9, 130.6, 130.5, 129.8, 129.6, 128.7, 128.3, 128.2, 128.0, 127.8, 127.8, 127.4, 126.8, 125.7, 125.5, 124.9, 124.8, 123.7, 121.8, 113.2, 113.04, 69.6, 61.5, 51.8, 51.7, 47.0, 21.7, 21.7;

HRMS (ESI) *m/z* calcd for C<sub>47</sub>H<sub>35</sub>N<sub>3</sub>O<sub>8</sub>S<sub>2</sub>Na<sup>+</sup> (M+Na)<sup>+</sup> 856.1757, found 856.1759.

**Di-tert-butyl(3R,3a'S,5'S,6a'S)-6'-(4-chlorophenyl)-1',2,2'',3'-tetraoxo-2'-phenyl-1',2',3',3a',6',6a''-hexahydrodispiro[indoline-3,4'-cyclopenta[c]pyrrole-5',3''-indoline]-1,1''-dicarboxylate (3ab)**

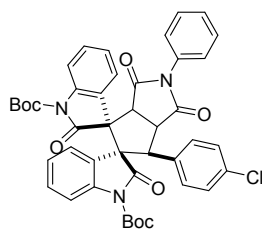

white solid, Mp: 241.4-242.5 °C, 93% yield, dr > 20:1;

<sup>1</sup>H NMR (400 MHz, CDCl<sub>3</sub>) δ 7.54 (t, *J* = 8.0 Hz, 3H), 7.49-7.43 (m, 2H), 7.37 (dd, *J* = 13.5, 6.0 Hz, 4H), 7.21 (ddd, *J* = 11.3, 8.3, 4.1 Hz, 2H), 7.13-7.05 (m, 6H), 4.93 (d, *J* = 9.5 Hz, 1H), 4.71 (t, *J* = 9.8 Hz, 1H),

4.60 (d,  $J = 10.1$  Hz, 1H), 1.62 (s, 9H), 1.55 (s, 9H);

$^{13}\text{C}$  NMR (100 MHz,  $\text{CDCl}_3$ )  $\delta$  175.9, 175.3, 175.0, 173.5, 147.8, 147.6, 139.8, 139.8, 133.8, 132.9, 132.0, 130.1, 130.0, 129.0, 128.7, 128.6, 127.0, 124.8, 124.5, 124.0, 123.7, 123.4, 121.8, 115.0, 115.0, 84.9, 70.5, 62.5, 51.2, 50.7, 48.1, 28.1, 28.0;

HRMS (ESI)  $m/z$  calcd for  $\text{C}_{43}\text{H}_{38}\text{ClN}_3\text{O}_8\text{Na}^+$  ( $\text{M}+\text{Na}$ ) $^+$  782.2239, found 782.2243.

**Di-tert-butyl(3R,3a'S,5'S,6a'S)-6'-(4-fluorophenyl)-1',2,2'',3'-tetraoxo-2'-phenyl-1',2',3',3a',6',6a'-hexahydrodispiro[indoline-3,4'-cyclopenta[c]pyrrole-5',3''-indoline]-1,1''-dicarboxylate (3ac)**

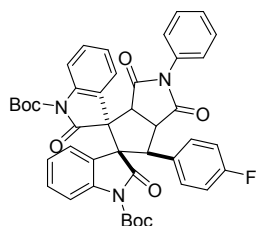

white solid, Mp: 236.6-238.1 °C, 95% yield, dr > 20:1;

$^1\text{H}$  NMR (400 MHz,  $\text{CDCl}_3$ )  $\delta$  7.53 (d,  $J = 5.9$  Hz, 3H), 7.45 (d,  $J = 7.4$  Hz, 2H), 7.36 (dd,  $J = 11.3, 8.2$  Hz, 4H), 7.24-7.19 (m, 1H), 7.18-7.05 (m, 5H), 6.83 (s, 2H), 4.93 (d,  $J = 9.5$  Hz, 1H), 4.71 (t,  $J = 9.8$  Hz, 1H), 4.60 (d,  $J = 10.1$  Hz, 1H), 1.62 (s, 9H), 1.54 (s, 9H);

$^{13}\text{C}$  NMR (100 MHz,  $\text{CDCl}_3$ )  $\delta$  176.0, 175.3, 175.1, 173.5, 163.5, 162.3 (d,  $J = 246.6$  Hz), 147.8, 147.7, 139.8, 132.0, 130.36 (d,  $J = 8.1$  Hz), 130.07 (d,  $J = 8.4$  Hz), 129.0, 128.6, 127.0, 124.8, 124.5, 124.0, 123.7, 123.5, 121.9, 115.4, 115.2, 115.0, 84.9, 84.8, 70.6, 62.4, 51.2, 50.7, 48.2, 28.1, 28.0;

HRMS (ESI)  $m/z$  calcd for  $\text{C}_{43}\text{H}_{38}\text{FN}_3\text{O}_8\text{Na}^+$  ( $\text{M}+\text{Na}$ ) $^+$  766.2535, found 766.2539.

**Di-tert-butyl(3R,3a'S,5'S,6a'S)-6'-(2-fluorophenyl)-1',2,2'',3'-tetraoxo-2'-phenyl-1',2',3',3a',6',6a'-hexahydrodispiro[indoline-3,4'-cyclopenta[c]pyrrole-5',3''-indoline]-1,1''-dicarboxylate (3ad)**

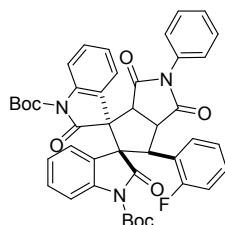

white solid, Mp: 242.9-243.8 °C, 76 % yield, dr > 20:1;

$^1\text{H}$  NMR (600 MHz,  $\text{CDCl}_3$ )  $\delta$  7.70 (t,  $J = 6.9$  Hz, 1H), 7.58 (d,  $J = 7.3$  Hz, 1H), 7.56 – 7.52 (m, 2H), 7.46 (t,  $J = 7.6$  Hz, 2H), 7.39 (d,  $J = 7.9$  Hz, 3H), 7.31–7.19 (m, 3H), 7.11 (m, 4H), 7.04 (t,  $J = 7.6$  Hz, 1H), 6.78 (t,  $J = 8.9$  Hz, 1H), 5.51 (d,  $J = 9.8$  Hz, 1H), 4.69 (t,  $J = 9.9$  Hz, 1H), 4.62 (d,  $J = 10.1$  Hz, 1H), 1.62 (s, 9H), 1.55 (s, 9H).

$^{13}\text{C}$  NMR (150 MHz,  $\text{CDCl}_3$ )  $\delta$  175.7, 175.1, 175.1, 173.7, 160.8 (d,  $J = 248.3$  Hz), 147.8, 147.7, 139.8, 132.0, 130.0, 129.9, 128.9, 128.6, 127.3, 127.0, 125.0, 124.2, 124.0, 123.4, 121.7, 115.6, 115.48 (d,  $J = 23.4$  Hz), 115.0, 114.38 (s), 84.8, 84.7, 70.5, 62.7, 51.2, 48.3, 28.0, 27.9;

HRMS (ESI)  $m/z$  calcd for  $\text{C}_{43}\text{H}_{38}\text{FN}_3\text{O}_8\text{Na}^+$  ( $\text{M}+\text{Na}$ ) $^+$  766.2535, found 766.2536.

**Di-tert-butyl(3R,3a'S,5'S,6a'S)-6'-(3-bromophenyl)-1',2,2'',3'-tetraoxo-2'-phenyl-1',2',3',3a',6',6a'-hexahydrodispiro[indoline-3,4'-cyclopenta[c]pyrrole-5',3''-indoline]-1,1''-dicarboxylate (3ae)**

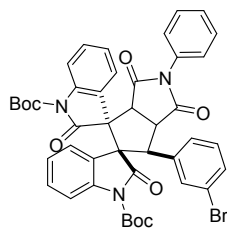

white solid, Mp: 236.1-237.3 °C, 85% yield, dr > 20:1;

**<sup>1</sup>H NMR** (400 MHz, CDCl<sub>3</sub>) δ 7.54 (dd, *J* = 15.2, 5.3 Hz, 3H), 7.49-7.42 (m, 2H), 7.42-7.35 (m, 5H), 7.29-7.24 (m, 1H), 7.23-7.14 (m, 2H), 7.13-7.04 (m, 3H), 7.00 (d, *J* = 7.8 Hz, 1H), 4.91 (d, *J* = 9.3 Hz, 1H), 4.70 (t, *J* = 9.7 Hz, 1H), 4.61 (d, *J* = 10.1 Hz, 1H), 1.62 (s, 9H), 1.56 (s, 9H);

**<sup>13</sup>C NMR** (100 MHz, CDCl<sub>3</sub>) δ 175.9, 175.2, 175.0, 173.3, 147.9, 147.8, 139.8, 139.8, 131.0, 130.24, 130.0, 129.9, 129.0, 128.7, 127.4, 127.0, 124.8, 124.6, 124.0, 123.7, 123.4, 122.5, 121.7, 115.0, 115.0, 84.9, 70.5, 62.4, 51.2, 50.9, 48.0, 28.1, 28.0;

**HRMS** (ESI) *m/z* calcd for C<sub>43</sub>H<sub>38</sub>BrN<sub>3</sub>O<sub>8</sub>Na<sup>+</sup> (M+Na)<sup>+</sup> 826.1734, found 826.1738.

**Di-tert-butyl(3R,3a'S,5'S,6a'S)-6'-(3-chlorophenyl)-1',2,2'',3'-tetraoxo-2'-phenyl-1',2',3',3a',6',6a'-hexahydrodispiro[indoline-3,4'-cyclopenta[c]pyrrole-5',3''-indoline]-1,1''-dicarboxylate (3af)**

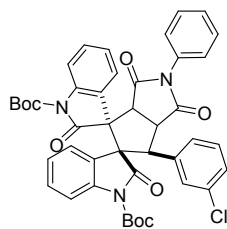

white solid, Mp: 226.4-227.1 °C, 90% yield, dr > 20:1;

**<sup>1</sup>H NMR** (400 MHz, CDCl<sub>3</sub>) δ 7.57-7.51 (m, 3H), 7.49-7.44 (m, 2H), 7.38 (dd, *J* = 9.7, 3.5 Hz, 4H), 7.23 (dd, *J* = 14.8, 6.2 Hz, 3H), 7.14-7.07 (m, 3H), 7.03 (dd, *J* = 14.7, 7.7 Hz, 2H), 4.92 (d, *J* = 9.4 Hz, 1H), 4.70 (t, *J* = 9.8 Hz, 1H), 4.61 (d, *J* = 10.1 Hz, 1H), 1.62 (s, 9H), 1.56 (s, 9H).

**<sup>13</sup>C NMR** (100 MHz, CDCl<sub>3</sub>) δ 175.9, 175.2, 175.0, 173.3, 147.9, 147.8, 139.8, 139.8, 136.5, 134.2, 132.0, 130.2, 130.0, 129.6, 129.0, 128.8, 128.7, 128.1, 127.0, 126.9, 124.8, 124.6, 124.0, 123.6, 123.4, 121.7, 115.0, 114.9, 84.9, 84.9, 70.4, 62.4, 51.2, 51.0, 48.0, 28.1, 27.9; **HRMS** (ESI) *m/z* calcd for C<sub>43</sub>H<sub>38</sub>ClN<sub>3</sub>O<sub>8</sub>Na<sup>+</sup> (M+Na)<sup>+</sup> 782.2239, found 782.2243.

**Di-tert-butyl(3R,3a'S,5'S,6a'S)-6'-(4-methoxyphenyl)-1',2,2'',3'-tetraoxo-2'-phenyl-1',2',3',3a',6',6a'-hexahydrodispiro[indoline-3,4'-cyclopenta[c]pyrrole-5',3''-indoline]-1,1''-dicarboxylate (3ag)**

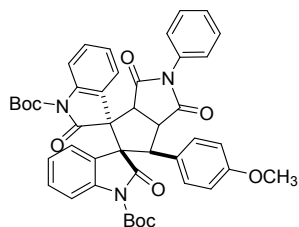

white solid, Mp: 246.2-247.1 °C, 85% yield, dr > 20:1;

**<sup>1</sup>H NMR** (400 MHz, CDCl<sub>3</sub>) δ 7.54 (d, *J* = 7.1 Hz, 3H), 7.45 (d, *J* = 7.0 Hz, 2H), 7.36 (dd, *J* = 16.9, 7.8 Hz, 4H), 7.21 (s, 1H), 7.15 (s, 1H), 7.12-7.04 (m, 4H), 6.66 (d, *J* = 8.6 Hz, 2H), 4.90 (d, *J* = 9.6 Hz, 1H), 4.71 (t, *J* = 9.8 Hz, 1H), 4.60 (d, *J* = 10.0 Hz, 1H), 3.69 (s, 3H), 1.62 (s, 9H), 1.54 (s, 9H);



$^{13}\text{C}$  NMR (100 MHz,  $\text{CDCl}_3$ )  $\delta$  176.1, 175.3, 175.3, 173.7, 159.0, 147.9, 147.8, 139.8, 139.8, 132.1, 129.9, 129.8, 129.0, 128.6, 127.0, 126.1, 124.7, 124.4, 124.0, 123.7, 122.2, 115.0, 114.9, 113.8, 84.8, 84.6, 70.6, 62.4, 55.0, 51.3, 50.9, 48.2, 28.1, 28.0;

HRMS (ESI)  $m/z$  calcd for  $\text{C}_{44}\text{H}_{41}\text{N}_3\text{O}_9\text{Na}^+$  ( $\text{M}+\text{Na}$ ) $^+$  778.2735, found 778.2738.

**Di-tert-butyl(3R,5'S,6'S)-6'-(2-methoxyphenyl)-1',2,2'',3'-tetraoxo-2'-phenyl-1',2',3',3a',6',6a'-hexahydrodispiro[indoline-3,4'-cyclopenta[c]pyrrole-5',3''-indoline]-1,1''-dicarboxylate(3ah)**

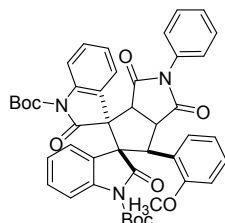

white solid, Mp: 245.8-246.9  $^\circ\text{C}$ , 75% yield, dr > 20:1;

$^1\text{H}$  NMR (400 MHz,  $\text{CDCl}_3$ )  $\delta$  7.66 (d,  $J$  = 7.3 Hz, 1H), 7.58 (dd,  $J$  = 16.0, 7.4 Hz, 2H), 7.52-7.23 (m, 8H), 7.20 (t,  $J$  = 7.8 Hz, 1H), 7.08 (dd,  $J$  = 17.2, 8.3 Hz, 3H), 6.98 (t,  $J$  = 7.6 Hz, 1H), 6.89 (t,  $J$  = 7.5 Hz, 1H), 6.56 (d,  $J$  = 8.1 Hz, 1H), 5.81 (d,  $J$  = 9.3 Hz, 1H), 4.62 (t,  $J$  = 7.7 Hz, 1H), 3.44 (s, 3H), 1.61 (s, 9H), 1.54 (s, 9H);

$^{13}\text{C}$  NMR (100 MHz,  $\text{CDCl}_3$ )  $\delta$  176.1, 175.4, 175.4, 173.9, 157.5, 147.9, 147.8, 139.8, 139.6, 132.2, 129.8, 129.4, 129.0, 128.9, 128.7, 128.5, 127.1, 125.5, 124.7, 124.2, 123.9, 123.3, 122.8, 121.6, 120.6, 114.9, 114.1, 110.6, 84.7, 84.4, 70.8, 62.6, 54.9, 51.4, 48.5, 42.0, 28.1, 28.0;

HRMS (ESI)  $m/z$  calcd for  $\text{C}_{44}\text{H}_{41}\text{N}_3\text{O}_9\text{Na}^+$  ( $\text{M}+\text{Na}$ ) $^+$  778.2735, found 778.2739.

**Di-tert-butyl(3R,3a'S,5'S,6a'S)-1',2,2'',3'-tetraoxo-2'-phenyl-6'-(4(trifluoromethyl)phenyl)-1',2',3',3a',6',6a'-hexahydrodispiro[indoline-3,4'-cyclopenta[c]pyrrole-5',3''-indoline]-1,1''-dicarboxylate (3ai)**

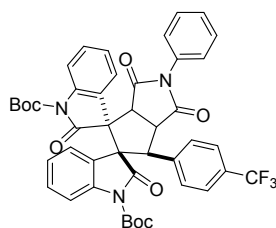

white solid, Mp: 235.8-236.9  $^\circ\text{C}$ , 92% yield, dr > 20:1;

$^1\text{H}$  NMR (400 MHz,  $\text{CDCl}_3$ )  $\delta$  7.54 (t,  $J$  = 8.5 Hz, 3H), 7.49-7.44 (m, 2H), 7.43-7.34 (m, 6H), 7.31 (d,  $J$  = 8.2 Hz, 2H), 7.20 (dd,  $J$  = 16.8, 8.3 Hz, 2H), 7.11 (dt,  $J$  = 12.3, 6.3 Hz, 2H), 5.01 (d,  $J$  = 9.5 Hz, 1H), 4.77 (t,  $J$  = 9.8 Hz, 1H), 4.62 (d,  $J$  = 10.1 Hz, 1H), 1.62 (s, 9H), 1.54 (s, 9H);

$^{13}\text{C}$  NMR (100 MHz,  $\text{CDCl}_3$ )  $\delta$  175.9, 175.2, 174.9, 173.4, 147.8, 147.6, 139.8, 139.7, 138.6, 132.0, 130.24 (d,  $J$  = 17.5 Hz), 129.1, 128.7, 127.0, 125.3 (d,  $J$  = 164 Hz), 124.9, 124.6, 124.0, 123.7, 123.3, 121.6, 115.1, 85.0, 85.0, 70.4, 62.6, 51.1, 50.8, 48.0, 28.1, 27.9;

HRMS (ESI)  $m/z$  calcd for  $\text{C}_{44}\text{H}_{38}\text{F}_3\text{N}_3\text{O}_8\text{Na}^+$  ( $\text{M}+\text{Na}$ ) $^+$  816.2503, found 816.2506.

**Di-tert-butyl(3R,3a'S,5'S,6a'S)-6'-(4-bromophenyl)-1',2,2'',3'-tetraoxo-2'-phenyl-1',2',3',3a',6',6a'-hexahydrodispiro[indoline-3,4'-cyclopenta[c]pyrrole-5',3''-indoline]-1,1''-dicarboxylate (3aj)**

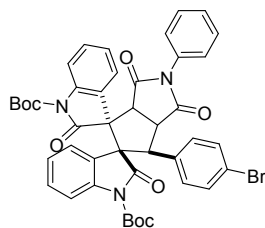

white solid, Mp: 264.2-265.3 °C, 93% yield, dr > 20:1;

<sup>1</sup>H NMR (400 MHz, CDCl<sub>3</sub>) δ 7.53 (t, *J* = 8.4 Hz, 3H), 7.49-7.43 (m, 2H), 7.38 (q, *J* = 6.8 Hz, 4H), 7.29-7.23 (m, 4H), 7.18 (dd, *J* = 13.5, 5.6 Hz, 1H), 7.1-7.05 (m, 3H), 4.91 (d, *J* = 9.5 Hz, 1H), 4.69 (t, *J* = 9.7 Hz, 1H), 4.59 (d, *J* = 10.1 Hz, 1H), 1.62 (s, 9H), 1.55 (s, 9H);

<sup>13</sup>C NMR (100 MHz, CDCl<sub>3</sub>) δ 175.9, 175.2, 175.0, 173.5, 147.8, 147.6, 139.8, 139.7, 133.4, 132.0, 131.6, 130.4, 130.2, 130.0, 129.0, 128.7, 127.0, 124.86 (s), 124.55 (s), 124.0, 123.6, 123.4, 122.0, 121.7, 115.0, 84.9, 84.9, 70.4, 62.5, 51.1, 50.7, 48.0, 28.0, 27.9;

HRMS (ESI) *m/z* calcd for C<sub>43</sub>H<sub>38</sub>BrN<sub>3</sub>O<sub>8</sub>Na<sup>+</sup> (M+Na)<sup>+</sup> 826.1734, found 826.1739.

**Di-tert-butyl(3R,3a'S,5'S,6a'S)-6'-(4-bromophenyl)-1',2,2'',3'-tetraoxo-2'-phenyl-1',2',3',3a',6',6a'-hexahydrodispiro[indoline-3,4'-cyclopenta[c]pyrrole-5',3''-indoline]-1,1''-dicarboxylate (3ak)**

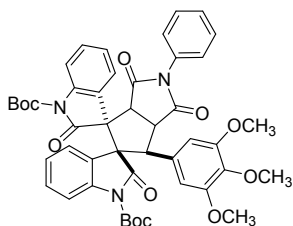

white solid, Mp: 230.1-231.4 °C, 96% yield, dr > 20:1;

<sup>1</sup>H NMR (600 MHz, CDCl<sub>3</sub>) δ 7.54 (s, 3H), 7.46 (d, *J* = 7.0 Hz, 2H), 7.43-7.37 (m, 4H), 7.24- 7.15 (m, 2H), 7.09 (dd, *J* = 16.3, 8.0 Hz, 2H), 6.37 (s, 2H), 4.90 (d, *J* = 9.3 Hz, 1H), 4.70 (t, *J* = 9.5 Hz, 1H), 4.62 (d, *J* = 10.1 Hz, 1H), 3.74 (s, 3H), 3.62 (s, 6H), 1.62 (s, 9H), 1.54 (s, 9H);

<sup>13</sup>C NMR (150MHz, CDCl<sub>3</sub>) δ 176.2, 175.5, 175.2, 173.7, 171.1, 152.7, 147.8, 147.7, 139.9, 139.8, 137.2, 132.0, 130.0, 129.9, 129.0, 128.73, 127.0, 126.4, 124.8, 124.3, 124.1, 123.7, 123.5, 122.5, 115.1, 105.3, 84.9, 84.8, 70.5, 62.2, 60.7, 60.3, 56.2, 55.7, 51.7, 51.3, 48.2, 28.6, 28.0, 27.9, 21.0, 14.2;

HRMS (ESI) *m/z* calcd for C<sub>46</sub>H<sub>45</sub>N<sub>3</sub>O<sub>11</sub>Na<sup>+</sup> (M+Na)<sup>+</sup> 838.2946, found 838.2949.

**Di-tert-butyl(3R,5'S,6'S)-6'-(3,4-dichlorophenyl)-1',2,2'',3'-tetraoxo-2'-phenyl-1',2',3',3a',6',6a'-hexahydrodispiro[indoline-3,4'-cyclopenta[c]pyrrole-5',3''-indoline]-1,1''-dicarboxylate (3al)**

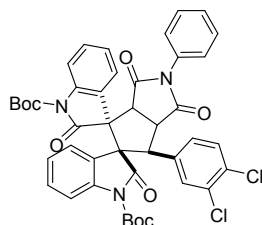

white solid, Mp: 235.6-236.7 °C, 95% yield, dr > 20:1;

<sup>1</sup>H NMR (600MHz, CDCl<sub>3</sub>) δ 7.56 (dd, *J* = 15.5, 7.9 Hz, 5H), 7.29 (dd, *J* = 13.2, 4.5 Hz, 4H), 7.13 (d, *J* = 12.8 Hz, 8H), 4.93 (d, *J* = 9.6 Hz, 1H), 4.77 (t, *J* = 9.7 Hz, 1H), 4.62 (d, *J* = 10.0 Hz, 1H), 1.62 (s, 9H), 1.53 (s, 9H);

<sup>13</sup>C NMR (150 MHz, CDCl<sub>3</sub>) δ 175.7, 175.1, 174.8, 173.2, 147.7, 147.5, 139.7, 139.6, 134.7, 132.4, 132.0,

131.8, 130.6, 130.3, 130.1, 129.0, 128.7, 128.0, 126.9, 124.8, 124.6, 123.8, 123.5, 123.1, 121.3, 115.0, 85.0, 84.9, 70.2, 62.40, 50.9, 50.2, 48.0, 28.0, 27.8;

**HRMS** (ESI)  $m/z$  calcd for  $C_{43}H_{37}Cl_2N_3O_8Na^+$  ( $M+Na$ ) $^+$  816.1849, found 816.1863.

**Di-tert-butyl(3R,5'S,6'S)-2'-(4-chlorophenyl)-1',2,2'',3'-tetraoxo-6'-phenyl-1',2',3',3a',6',6a'-hexahydrodispiro[indoline-3,4'-cyclopenta[c]pyrrole-5',3''-indoline]-1,1''-dicarboxylate (3am)**

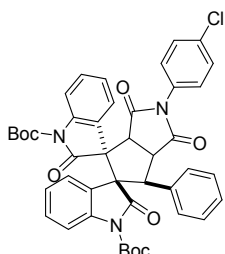

white solid, Mp: 235.1-236.4 °C, 89% yield, dr > 20:1;

**$^1H$  NMR** (400 MHz,  $CDCl_3$ )  $\delta$  7.54 (d,  $J$  = 7.1 Hz, 3H), 7.49-7.43 (m, 2H), 7.36 (dd,  $J$  = 16.9, 7.8 Hz, 4H), 7.22 (dd,  $J$  = 16.8, 8.9 Hz, 2H), 7.15 (t,  $J$  = 7.6 Hz, 1H), 7.11-7.06 (m, 3H), 6.66 (d,  $J$  = 8.6 Hz, 2H), 4.90 (d,  $J$  = 9.6 Hz, 1H), 4.71 (t,  $J$  = 9.8 Hz, 1H), 4.60 (d,  $J$  = 10.0 Hz, 1H), 3.69 (s, 3H), 1.62 (s, 9H), 1.54 (s, 9H);

**$^{13}C$  NMR** (100MHz,  $CDCl_3$ )  $\delta$  175.9, 175.5, 175.0, 173.5, 147.8, 147.7, 139.8, 134.4, 134.0, 130.6, 130.0, 129.2, 128.6, 128.4, 128.3, 127.8, 124.8, 124.4, 124.1, 123.7, 123.5, 122.0, 115.0, 114.9, 84.9, 84.7, 70.6, 62.6, 51.4, 51.2, 48.0, 28.1, 28.0;

**HRMS** (ESI)  $m/z$  calcd for  $C_{43}H_{38}ClN_3O_8Na^+$  ( $M+Na$ ) $^+$  782.2239, found 782.2243.

**Di-tert-butyl(3R,5'S,6'S)-1',2,2'',3'-tetraoxo-6'-phenyl-2'-(p-tolyl)-1',2',3',3a',6',6a'-hexahydrodispiro[indoline-3,4'-cyclopenta[c]pyrrole-5',3''-indoline]-1,1''-dicarboxylate (3an)**

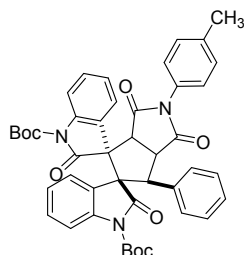

white solid, Mp: 246.3-247.1 °C, 87% yield, dr > 20:1;

**$^1H$  NMR** (400 MHz,  $CDCl_3$ )  $\delta$  7.54 (dd,  $J$  = 7.2, 3.3 Hz, 3H), 7.32 (s, 1H), 7.26 (s, 4H), 7.20 (d,  $J$  = 7.6 Hz, 1H), 7.18-7.11 (m, 6H), 7.08 (d,  $J$  = 7.8 Hz, 2H), 4.95 (d,  $J$  = 9.5 Hz, 1H), 4.75 (t,  $J$  = 9.8 Hz, 1H), 4.60 (d,  $J$  = 10.0 Hz, 1H), 2.37 (s, 3H), 1.62 (s, 9H), 1.53 (s, 9H);

**$^{13}C$  NMR** (100 MHz,  $CDCl_3$ )  $\delta$  176.2, 175.3, 173.5, 147.9, 147.8, 139.8, 139.7, 138.5, 134.3, 129.9, 129.6, 129.5, 128.7, 128.3, 127.7, 126.8, 124.8, 124.4, 124.1, 123.8, 123.7, 122.1, 115.0, 114.8, 84.7, 84.6, 70.6, 62.5, 51.4, 51.3, 48.0, 28.1, 28.0, 21.2;

**HRMS** (ESI)  $m/z$  calcd for  $C_{44}H_{41}N_3O_8Na^+$  ( $M+Na$ ) $^+$  762.2785, found 762.2788.

**Di-tert-butyl(3R,5'S,6'S)-2'-(4-bromophenyl)-1',2,2'',3'-tetraoxo-6'-phenyl-1',2',3',3a',6',6a'-hexahydrodispiro[indoline-3,4'-cyclopenta[c]pyrrole-5',3''-indoline]-1,1''-dicarboxylate (3ao)**

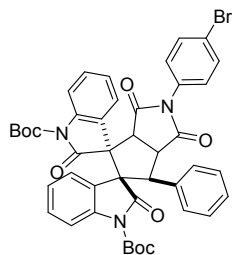

white solid, Mp: 228.4-229.3 °C, 90% yield, dr > 20:1;

**<sup>1</sup>H NMR** (300 MHz, CDCl<sub>3</sub>) δ 7.56 (dd, *J* = 15.5, 7.9 Hz, 5H), 7.29 (dd, *J* = 13.2, 4.5 Hz, 4H), 7.13 (d, *J* = 12.8 Hz, 8H), 4.93 (d, *J* = 9.6 Hz, 1H), 4.77 (t, *J* = 9.7 Hz, 1H), 4.62 (d, *J* = 10.0 Hz, 1H), 1.62 (s, 9H), 1.53 (s, 9H).

**<sup>13</sup>C NMR** (75 MHz, CDCl<sub>3</sub>) δ 175.8, 175.4, 175.0, 173.4, 147.8, 147.7, 139.7, 133.9, 132.2, 131.0, 130.0, 128.6, 128.4, 127.8, 124.8, 124.4, 124.0, 123.6, 123.4, 122.5, 121.9, 115.0, 114.9, 84.9, 84.7, 70.6, 62.5, 51.3, 51.1, 48.0, 28.0, 27.9;

**HRMS** (ESI) *m/z* calcd for C<sub>43</sub>H<sub>38</sub>BrN<sub>3</sub>O<sub>8</sub>Na<sup>+</sup> (M+Na)<sup>+</sup> 826.1734, found 826.1738.

**Di-tert-butyl(3R,3a'S,5'S,6a'S)-2'-(3-fluorophenyl)-1',2,2'',3'-tetraoxo-2'-phenyl-1',2',3',3a',6',6a'-hexahydrodispiro[indoline-3,4'-cyclopenta[c]pyrrole-5',3''-indoline]-1,1''-dicarboxylate (3ap)**

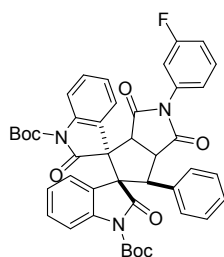

white solid, Mp: 223.1-224.2 °C, 83% yield, dr > 20:1;

**<sup>1</sup>H NMR** (400 MHz, CDCl<sub>3</sub>) δ 7.55 (t, *J* = 8.1 Hz, 3H), 7.45-7.38 (m, 1H), 7.33 (d, *J* = 8.0 Hz, 1H), 7.26-7.21 (m, 2H), 7.21-7.17 (m, 3H), 7.17-7.12 (m, 6H), 7.09 (dd, *J* = 7.0, 3.4 Hz, 2H), 4.94 (d, *J* = 9.5 Hz, 1H), 4.77 (t, *J* = 9.8 Hz, 1H), 4.62 (d, *J* = 10.1 Hz, 1H), 1.64 (s, 9H), 1.53 (s, 9H);

**<sup>13</sup>C NMR** (100 MHz, CDCl<sub>3</sub>) δ 175.8, 175.4, 174.9, 173.5, 162.67 (d, *J* = 247.2 Hz), 147.9, 147.7, 134.1, 133.4, 130.0, 128.6, 128.4, 127.8, 124.8, 124.4, 124.0, 123.7, 123.5, 122.8, 122.0, 115.8, 115.6, 114.6, 84.9, 84.7, 70.6, 62.6, 51.4, 51.2, 48.0, 28.1, 28.0;

**HRMS** (ESI) *m/z* calcd for C<sub>43</sub>H<sub>38</sub>FN<sub>3</sub>O<sub>8</sub>Na<sup>+</sup> (M+Na)<sup>+</sup> 766.2535, found 766.2536.

**Di-tert-butyl(3R,3a'S,5'S,6a'S)-6'-(2-methoxyphenyl)-1',2,2'',3'-tetraoxo-2'-phenyl-1',2',3',3a',6',6a'-hexahydrodispiro[indoline-3,4'-cyclopenta[c]pyrrole-5',3''-indoline]-1,1''-dicarboxylate(3aq)**

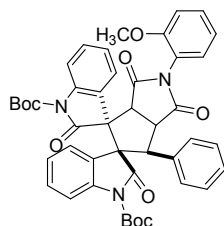

white solid, Mp: 226.1-227.6 °C, 75% yield, dr > 20:1;

**<sup>1</sup>H NMR** (400 MHz, CDCl<sub>3</sub>) δ 7.55 (t, *J* = 8.9 Hz, 3H), 7.43 (dd, *J* = 7.7, 1.5 Hz, 1H), 7.37-7.31 (m, 2H), 7.21-

7.16 (m, 3H), 7.09 (m,  $J = 12.8, 7.1, 4.9$  Hz, 7H), 6.97 (d,  $J = 8.2$  Hz, 1H), 4.96 (d,  $J = 9.5$  Hz, 1H), 4.80 (t,  $J = 9.8$  Hz, 1H), 4.67 (d,  $J = 10.1$  Hz, 1H), 3.77 (s, 3H), 1.62 (s, 9H), 1.53 (s, 9H);  
 $^{13}\text{C NMR}$  (100 MHz,  $\text{CDCl}_3$ )  $\delta$  175.9, 175.3, 175.0, 173.5, 154.8, 147.9, 147.8, 139.8, 139.7, 134.3, 130.4, 130.0, 129.5, 128.7, 128.3, 127.6, 124.7, 124.4, 124.1, 123.8, 123.7, 122.2, 120.8, 114.9, 114.8, 111.8, 84.7, 84.5, 70.7, 62.4, 55.7, 51.4, 51.3, 48.2, 28.1, 27.9;  
**HRMS** (ESI)  $m/z$  calcd for  $\text{C}_{44}\text{H}_{41}\text{N}_3\text{O}_9\text{Na}^+$  ( $\text{M}+\text{Na}$ ) $^+$  778.2735, found 778.2738.

**Di-tert-butyl(3R,5'S,6'S)-2'-(4-methoxyphenyl)-1',2'',3'-tetraoxo-6'-phenyl-1',2',3',3a',6',6a'-hexahydrodispiro[indoline-3,4'-cyclopenta[c]pyrrole-5',3''-indoline]-1,1''-dicarboxylate (3ar)**

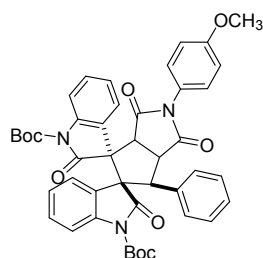

white solid, Mp: 226.1-227.6 °C, 86% yield, dr > 20:1;  
 $^1\text{H NMR}$  (400 MHz,  $\text{CDCl}_3$ )  $\delta$  7.57-7.51 (m, 3H), 7.32 (dd,  $J = 13.5, 8.5$  Hz, 3H), 7.22-7.06 (m, 9H), 6.96 (d,  $J = 8.9$  Hz, 2H), 4.94 (d,  $J = 9.6$  Hz, 1H), 4.75 (t,  $J = 9.8$  Hz, 1H), 4.60 (d,  $J = 10.0$  Hz, 1H), 3.82 (s, 3H), 1.62 (s, 9H), 1.53 (s, 9H);  
 $^{13}\text{C NMR}$  (100 MHz,  $\text{CDCl}_3$ )  $\delta$  176.4, 175.5, 175.3, 173.5, 159.5, 147.9, 147.8, 139.8, 139.7, 134.2, 129.9, 128.7, 128.4, 128.2, 127.7, 124.8, 124.4, 124.1, 123.7, 123.6, 122.1, 115.0, 114.8, 114.3, 84.8, 84.6, 70.6, 62.5, 55.4, 51.3, 51.2, 47.9, 28.1, 27.9;  
**HRMS** (ESI)  $m/z$  calcd for  $\text{C}_{44}\text{H}_{41}\text{N}_3\text{O}_9\text{Na}^+$  ( $\text{M}+\text{Na}$ ) $^+$  778.2735, found 778.2738.

**Di-tert-butyl(3R,3a'S,5'S,6a'S)-6'-(3-bromophenyl)-1',2'',3'-tetraoxo-2'-phenyl-1',2',3',3a',6',6a'-hexahydrodispiro[indoline-3,4'-cyclopenta[c]pyrrole-5',3''-indoline]-1,1''-dicarboxylate (3as)**

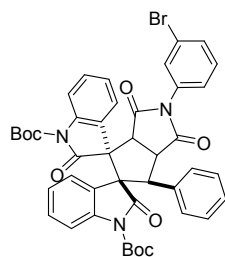

white solid, Mp: 226.1-227.8 °C, 80% yield, dr > 20:1;  
 $^1\text{H NMR}$  (400 MHz,  $\text{CDCl}_3$ )  $\delta$  7.55 (dd,  $J = 14.3, 10.0$  Hz, 5H), 7.33 (d,  $J = 4.3$  Hz, 3H), 7.23 (dd,  $J = 14.4, 6.3$  Hz, 2H), 7.18-7.12 (m, 6H), 7.07 (d,  $J = 7.8$  Hz, 1H), 4.94 (d,  $J = 9.5$  Hz, 1H), 4.76 (t,  $J = 9.8$  Hz, 1H), 4.62 (d,  $J = 10.0$  Hz, 1H), 1.63 (s, 9H), 1.53 (s, 9H);  
 $^{13}\text{C NMR}$  (100 MHz,  $\text{CDCl}_3$ )  $\delta$  175.8, 175.4, 174.9, 173.5, 147.9, 147.7, 139.8, 139.8, 134.1, 133.3, 131.8, 130.2, 130.0, 128.6, 128.4, 127.8, 125.8, 124.8, 124.4, 124.0, 123.7, 123.5, 122.3, 122.0, 115.0, 114.9, 84.9, 84.7, 70.6, 62.6, 51.4, 51.2, 48.0, 28.1, 28.0;  
**HRMS** (ESI)  $m/z$  calcd for  $\text{C}_{43}\text{H}_{38}\text{BrN}_3\text{O}_8\text{Na}^+$  ( $\text{M}+\text{Na}$ ) $^+$  826.1734, found 826.1738.

**Di-tert-butyl(3R,5'S,6'S)-1',2,2'',3'-tetraoxo-6'-phenyl-2'-(m-tolyl)-1',2',3',3a',6',6a'-**

**hexahydrodispiro[indoline-3,4'-cyclopenta[c]pyrrole-5',3''-indoline]-1,1''-dicarboxylate (3at)**

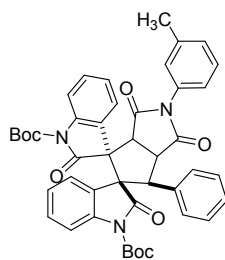

white solid, Mp: 232.2-233.4 °C, 85% yield, dr > 20:1;

**<sup>1</sup>H NMR** (300 MHz, CDCl<sub>3</sub>) δ 7.56 (dd, *J* = 15.5, 7.9 Hz, 5H), 7.29 (dd, *J* = 13.2, 4.5 Hz, 4H), 7.13 (d, *J* = 12.8 Hz, 8H), 4.93 (d, *J* = 9.6 Hz, 1H), 4.77 (t, *J* = 9.7 Hz, 1H), 4.62 (d, *J* = 10.0 Hz, 1H), 1.62 (s, 9H), 2.39(s,3H), 1.53 (s, 9H);

**<sup>13</sup>C NMR** (75 MHz, CDCl<sub>3</sub>) δ 176.1, 175.2, 139.7, 138.9, 134.1, 129.8, 129.4, 128.7, 128.6, 128.3, 127.6, 127.5, 124.7, 124.3, 124.0, 123.6, 123.5, 122.0, 114.9, 114.8, 84.7, 84.5, 70.5, 62.4, 51.3, 51.2, 47.9, 28.0, 27.9, 21.2;

**HRMS** (ESI) *m/z* calcd for C<sub>44</sub>H<sub>41</sub>N<sub>3</sub>O<sub>8</sub>Na<sup>+</sup> (*M*+Na)<sup>+</sup> 762.2785, found 762.2788.

**Di-tert-butyl(3R,3a'S,5'S,6a'S)-2'-(naphthalen-2-yl)-1',2,2'',3'-tetraoxo-2'-phenyl-1',2',3',3a',6',6a'-hexahydrodispiro[indoline-3,4'-cyclopenta[c]pyrrole-5',3''-indoline]-1,1''-dicarboxylate (3au)**

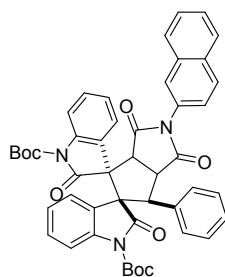

white solid, Mp: 268.1-269.4 °C, 92% yield, dr 3:1;

**<sup>1</sup>H NMR** (600 MHz, CDCl<sub>3</sub>) δ 7.93 (d, *J* = 8.2 Hz, 1H), 7.89 (dd, *J* = 6.0, 3.4 Hz, 1H), 7.72–7.63 (m, 2H), 7.62 – 7.52 (m, 7H), 7.53–7.47 (m, 3H), 7.36 (d, *J* = 8.0 Hz, 1H), 7.21–7.16 (m, 6H), 7.15–7.09 (m, 8H), 5.06 (d, *J* = 9.5 Hz, 1H), 4.96 (dd, *J* = 10.1, 4.4 Hz, 1H), 4.82 (d, *J* = 10.2 Hz, 1H), 1.65 (s, 9H), 1.55 (s, 9H);

**<sup>13</sup>C NMR** (150 MHz, CDCl<sub>3</sub>) δ 176.5, 176.0, 175.5, 173.6, 147.9, 147.8, 139.8, 134.2, 134.2, 129.9, 129.7, 129.5, 128.7, 128.4, 127.7, 126.9, 126.8, 126.5, 126.3, 126.1, 125.5, 124.8, 124.4, 124.1, 123.7, 123.5, 122.1, 122.0, 115.0, 114.9, 84.8, 84.7, 70.7, 62.6, 51.4, 51.0, 48.3, 28.1, 28.0;

**HRMS** (ESI) *m/z* calcd for C<sub>47</sub>H<sub>41</sub>N<sub>3</sub>O<sub>8</sub>Na<sup>+</sup> (*M*+Na)<sup>+</sup> 798.2785, found 798.2788.

**Di-tert-butyl(3R,3a'S,5'S,6a'S)-6'-(4-fluorophenyl)-1',2,2'',3'-tetraoxo-2'-phenyl-1',2',3',3a',6',6a'-hexahydrodispiro[indoline-3,4'-cyclopenta[c]pyrrole-5',3''-indoline]-1,1''-dicarboxylate (3av)**

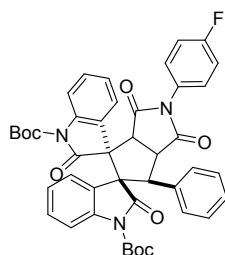

white solid, Mp: 231.1-232.2 °C, 96% yield, dr > 20:1;

**<sup>1</sup>H NMR** (400 MHz, CDCl<sub>3</sub>) δ 7.54 (d, *J* = 8.0 Hz, 3H), 7.39-7.31 (m, 3H), 7.26-7.20 (m, 3H), 7.17-7.11 (m, 8H), 7.10-7.05 (m, 1H), 4.93 (d, *J* = 9.6 Hz, 1H), 4.77 (t, *J* = 9.8 Hz, 1H), 4.62 (d, *J* = 10.0 Hz, 1H), 1.62 (s, 9H), 1.53 (s, 9H);

**<sup>13</sup>C NMR** (100 MHz, CDCl<sub>3</sub>) δ 176.0, 175.3, 175.1, 173.5, 162.35 (d, *J* = 246.6 Hz), 147.8, 147.7, 139.8, 132.0, 130.36 (d, *J* = 8.1 Hz), 130.07 (d, *J* = 8.4 Hz), 129.0, 128.6, 127.0, 124.8, 124.5, 124.0, 123.7, 123.5, 121.9, 115.4, 115.2, 115.0 (d, *J* = 13Hz), 84.9, 84.8, 70.6, 62.4, 51.2, 50.7, 48.2, 28.1, 28.0;

HRMS (ESI) *m/z* calcd for C<sub>43</sub>H<sub>38</sub>FN<sub>3</sub>O<sub>8</sub>Na<sup>+</sup> (M+Na)<sup>+</sup> 766.2535, found 766.2537.

**Di-tert-butyl(3*R*,5*S*,6*S*)-2'-(4-nitrophenyl)-1',2,2'',3'-tetraoxo-6'-phenyl-1',2',3',3a',6',6a'-hexahydrodispiro[indoline-3,4'-cyclopenta[c]pyrrole-5',3''-indoline]-1,1''-dicarboxylate (3aw)**

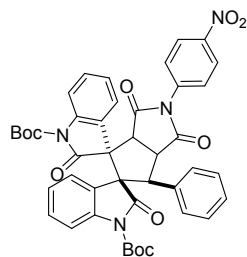

white solid, Mp: 247.1-248.6 °C, 86% yield, dr > 20:1;

**<sup>1</sup>H NMR** (400 MHz, CDCl<sub>3</sub>) δ 8.33 (d, *J* = 9.0 Hz, 2H), 7.63 (d, *J* = 8.9 Hz, 2H), 7.54 (s, 3H), 7.34 (d, *J* = 8.1 Hz, 1H), 7.26 (s, 3H), 7.16 (s, 7H), 4.93 (d, *J* = 9.6 Hz, 1H), 4.82 (t, *J* = 9.8 Hz, 1H), 4.66 (d, *J* = 10.0 Hz, 1H), 1.62 (s, 9H), 1.54 (s, 9H);

**<sup>13</sup>C NMR** (100 MHz, CDCl<sub>3</sub>) δ 175.4, 174.7, 147.7, 147.7, 147.2, 139.8, 139.7, 137.5, 133.7, 130.1, 128.6, 128.5, 128.0, 127.6, 124.9, 124.5, 124.3, 124.0, 123.6, 123.3, 121.7, 115.1, 115.0, 85.1, 84.8, 70.6, 62.7, 51.4, 51.1, 48.0, 28.0, 27.9;

HRMS (ESI) *m/z* calcd for C<sub>43</sub>H<sub>38</sub>N<sub>4</sub>O<sub>10</sub>Na<sup>+</sup> (M+Na)<sup>+</sup> 793.2480, found 793.2482.

**Di-tert-butyl(3*R*,5*S*,6*S*)-2'-(2-bromophenyl)-1',2,2'',3'-tetraoxo-6'-phenyl-1',2',3',3a',6',6a'-hexahydrodispiro[indoline-3,4'-cyclopenta[c]pyrrole-5',3''-indoline]-1,1''-dicarboxylate (3ax)**

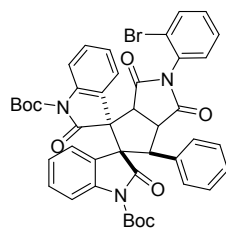

white solid, Mp: 250.1-251.2 °C, 91% yield, dr > 20:1;

**<sup>1</sup>H NMR** (400 MHz, CDCl<sub>3</sub>) δ 7.66 (dd, *J* = 8.0, 0.9 Hz, 1H), 7.57-7.51 (m, 4H), 7.43 (td, *J* = 7.7, 1.1 Hz, 1H), 7.36 (d, *J* = 8.0 Hz, 1H), 7.30 (dd, *J* = 7.8, 1.4 Hz, 1H), 7.24-7.15 (m, 4H), 7.15-7.06 (m, 5H), 4.97 (d, *J* = 9.4 Hz, 1H), 4.83 (t, *J* = 9.8 Hz, 1H), 4.72 (d, *J* = 10.1 Hz, 1H), 1.63 (s, 9H), 1.54 (s, 9H).

**<sup>13</sup>C NMR** (100 MHz, CDCl<sub>3</sub>) δ 175.6, 175.2, 174.3, 173.4, 147.8, 139.8, 139.8, 134.2, 133.1, 131.8, 130.7, 130.6, 130.0, 128.7, 128.4, 127.8, 124.8, 124.4, 124.1, 123.7, 123.5, 122.2, 122.1, 115.0, 114.9, 84.8, 84.6, 70.7, 62.5, 51.4, 51.2, 48.3, 28.1, 28.0;

HRMS (ESI) *m/z* calcd for C<sub>43</sub>H<sub>38</sub>BrN<sub>3</sub>O<sub>8</sub>Na<sup>+</sup> (M+Na)<sup>+</sup> 826.1734, found 826.1737.

**(3R,5'S,6'S)-2',6'-diphenyl-6',6a'-dihydrodispiro[indoline-3,4'-cyclopenta[c]pyrrole-5',3''-indoline]-1',2,2'',3'(2'H,3a'H)-tetraone (4)**

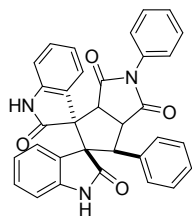

white solid, Mp: 253.1-254.2 °C, 91% yield, dr > 20:1;

**<sup>1</sup>H NMR** (400 MHz, DMSO) δ 10.85 (s, 1H), 10.39 (s, 1H), 7.47 m, 5H), 7.28 (d, *J* = 7.6 Hz, 2H), 7.13 (d, *J* = 13.0 Hz, 6H), 7.04 (t, *J* = 7.6 Hz, 1H), 6.96 (q, *J* = 7.0 Hz, 2H), 6.65 (d, *J* = 7.7 Hz, 1H), 6.40 (d, *J* = 7.6 Hz, 1H), 4.88 (d, *J* = 9.6 Hz, 1H), 4.70 (t, *J* = 9.8 Hz, 1H), 4.56 (d, *J* = 9.9 Hz, 1H);

**<sup>13</sup>C NMR** (100MHz, DMSO) δ 178.4, 177.6, 176.5, 176.2, 142.7, 142.5, 136.1, 133.0, 129.69, 129.64, 129.3, 128.9, 128.4, 127.8, 127.7, 127.3, 124.9, 124.7, 124.6, 122.6, 122.3, 110.1, 109.7, 69.5, 60.8, 51.8, 51.1, 48.0;

**HRMS** (ESI) *m/z* calcd for C<sub>33</sub>H<sub>23</sub>N<sub>3</sub>O<sub>4</sub>Na<sup>+</sup> (M+Na)<sup>+</sup> 548.1580, found 548.1584.







Compound 3ca

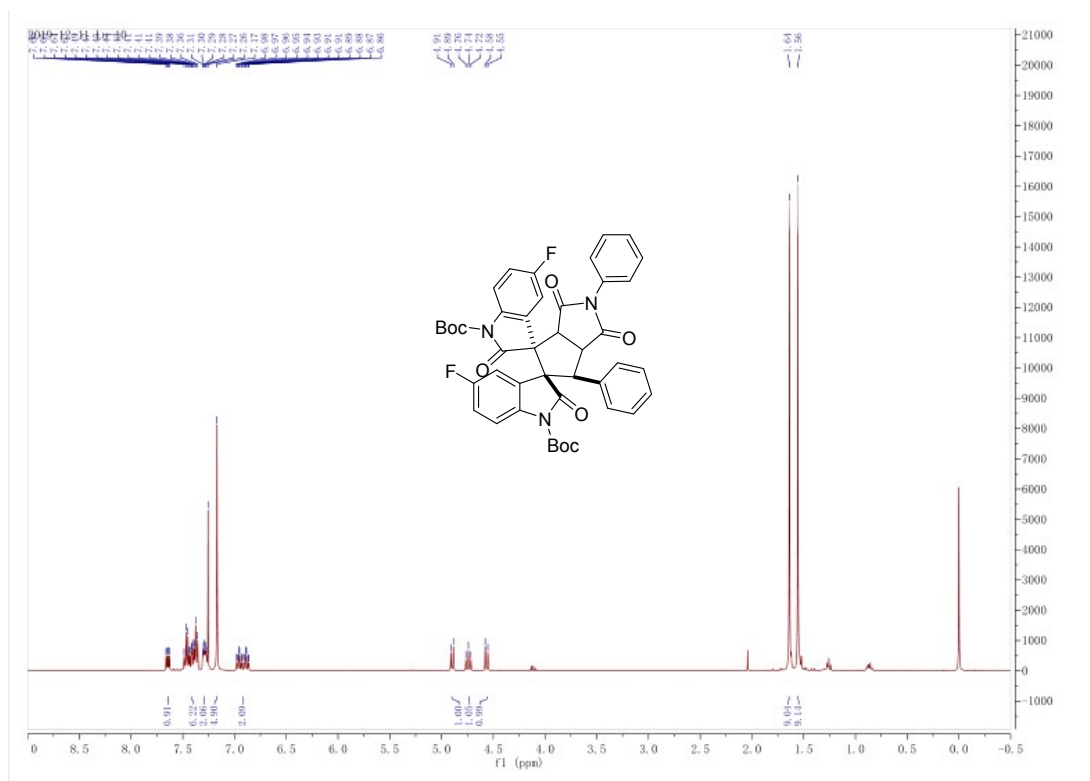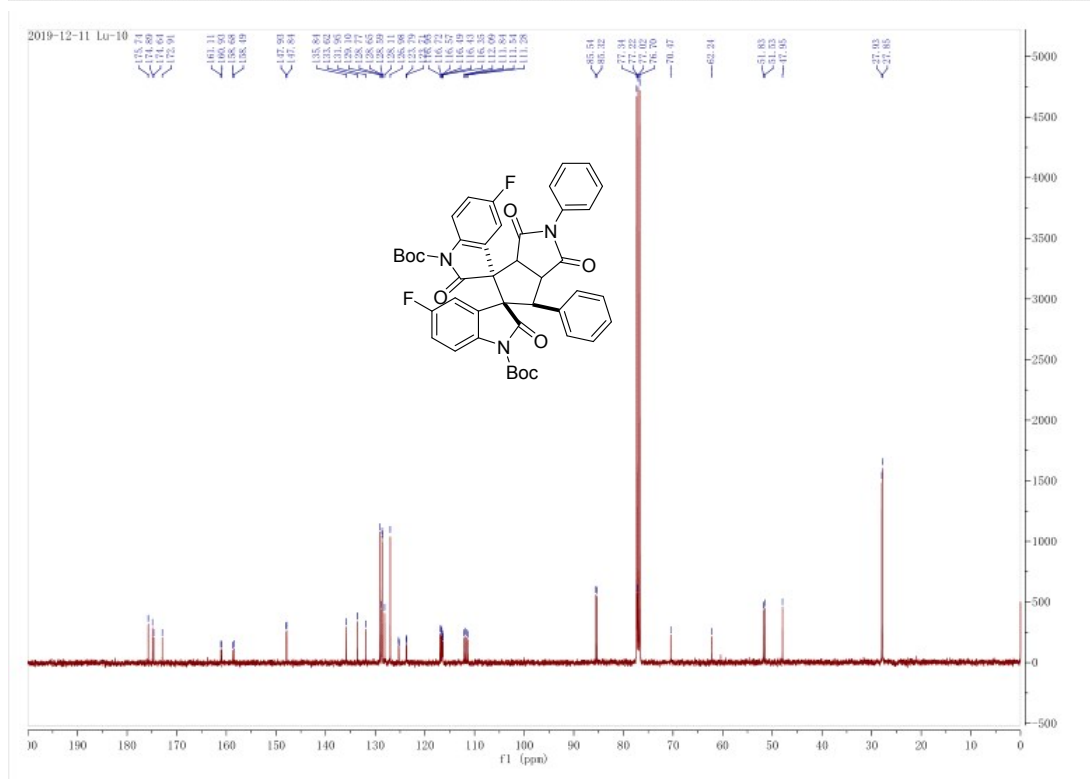

### Compound 3da

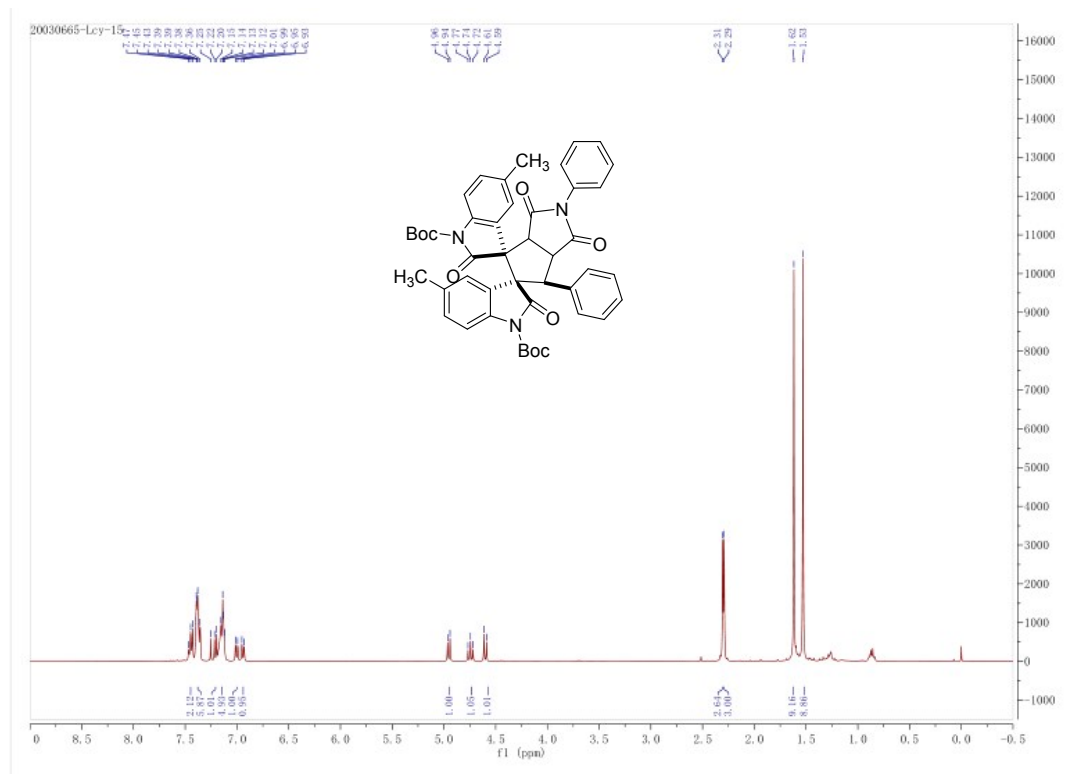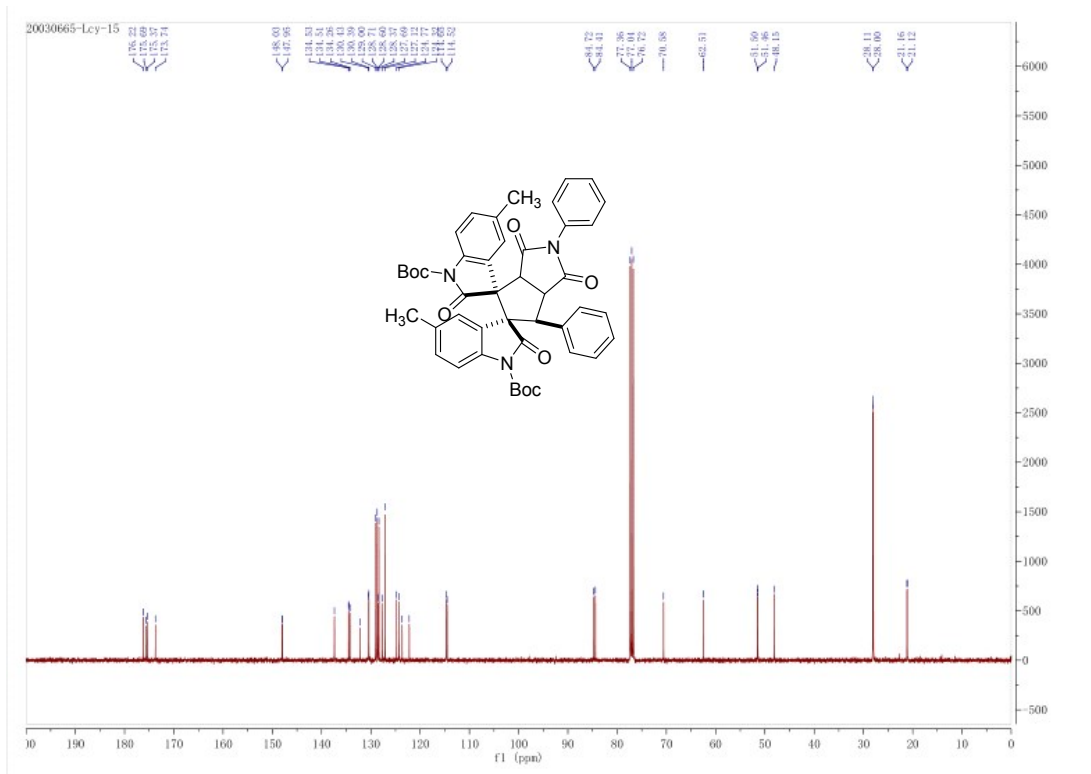

Compound 3ea

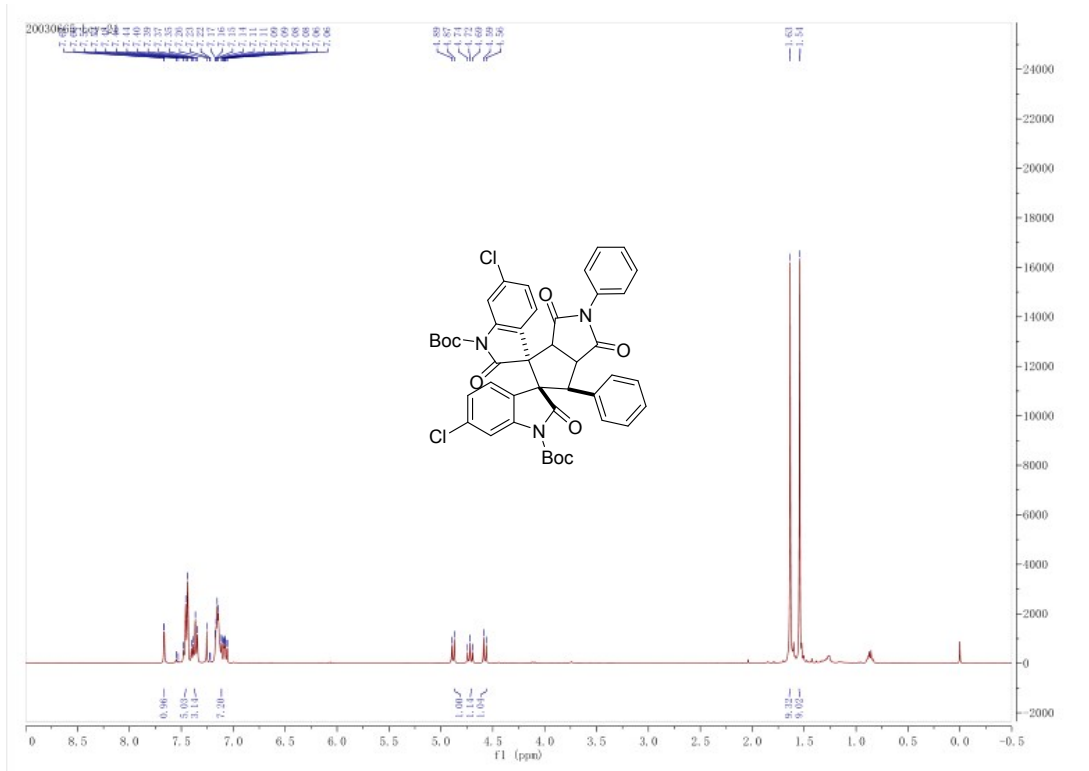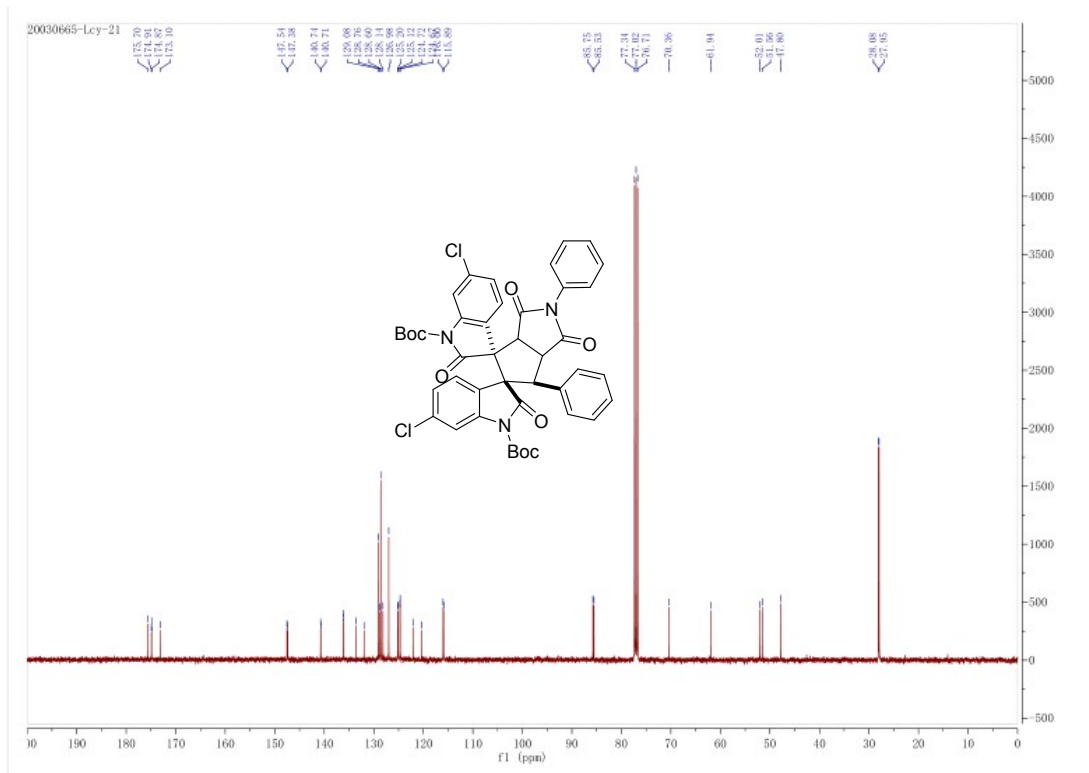

## Compound 3fa

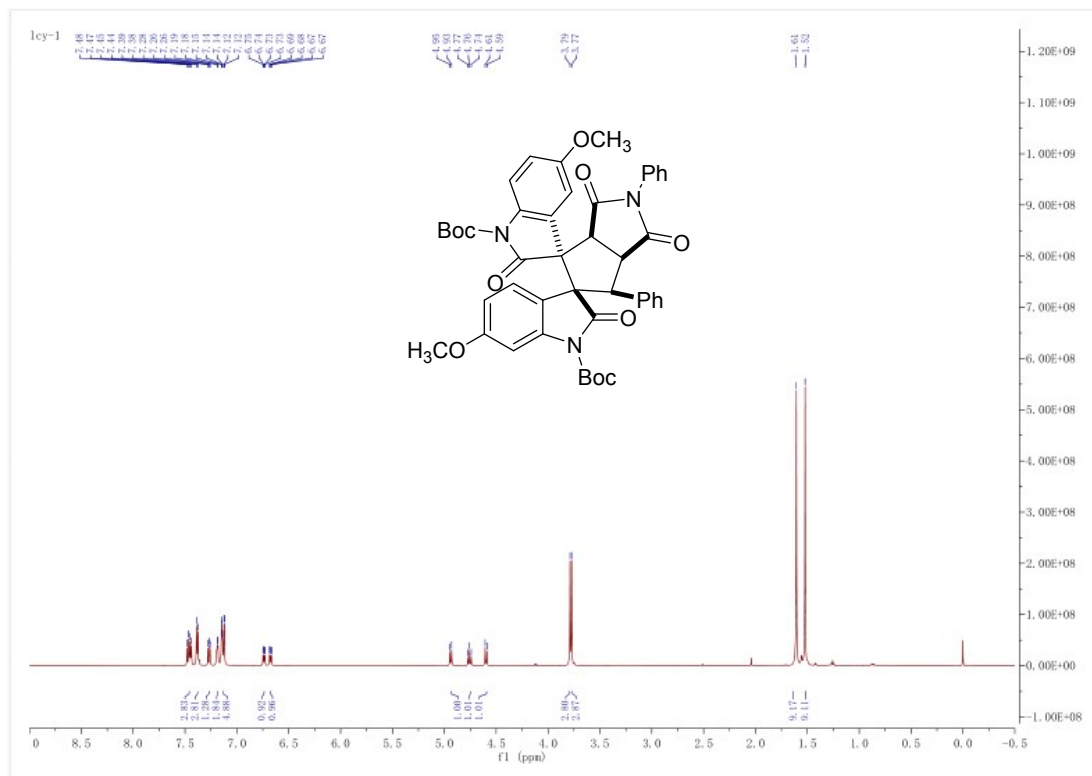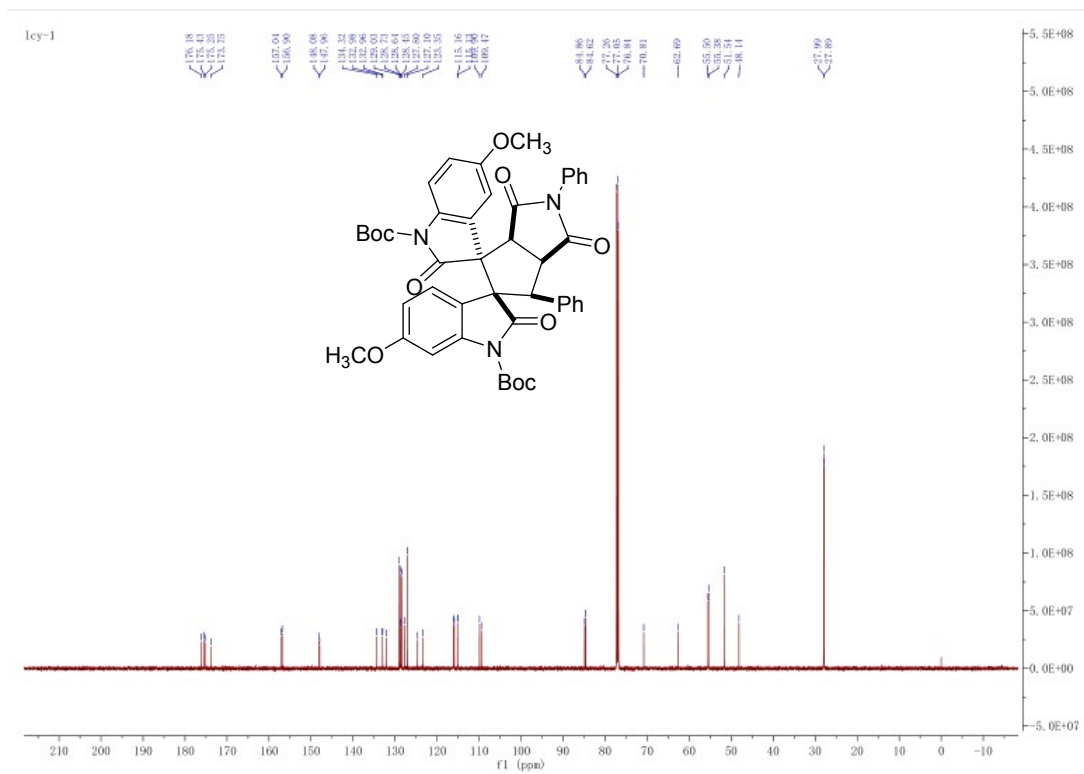

# Compound 3ga

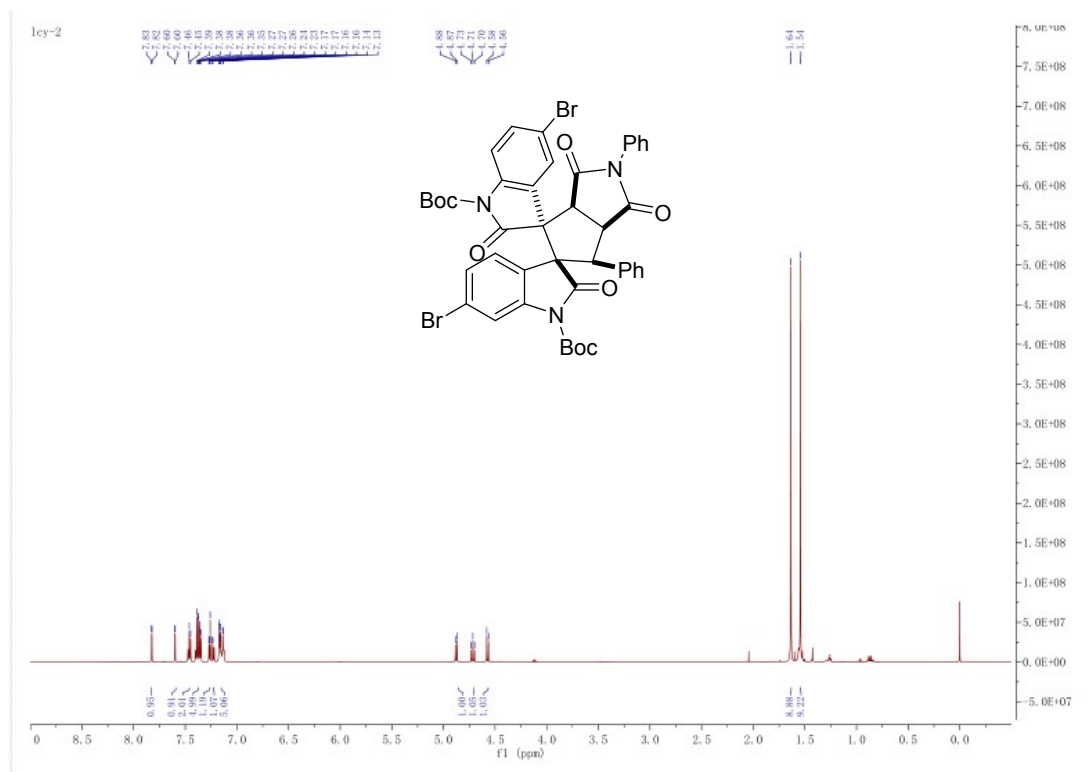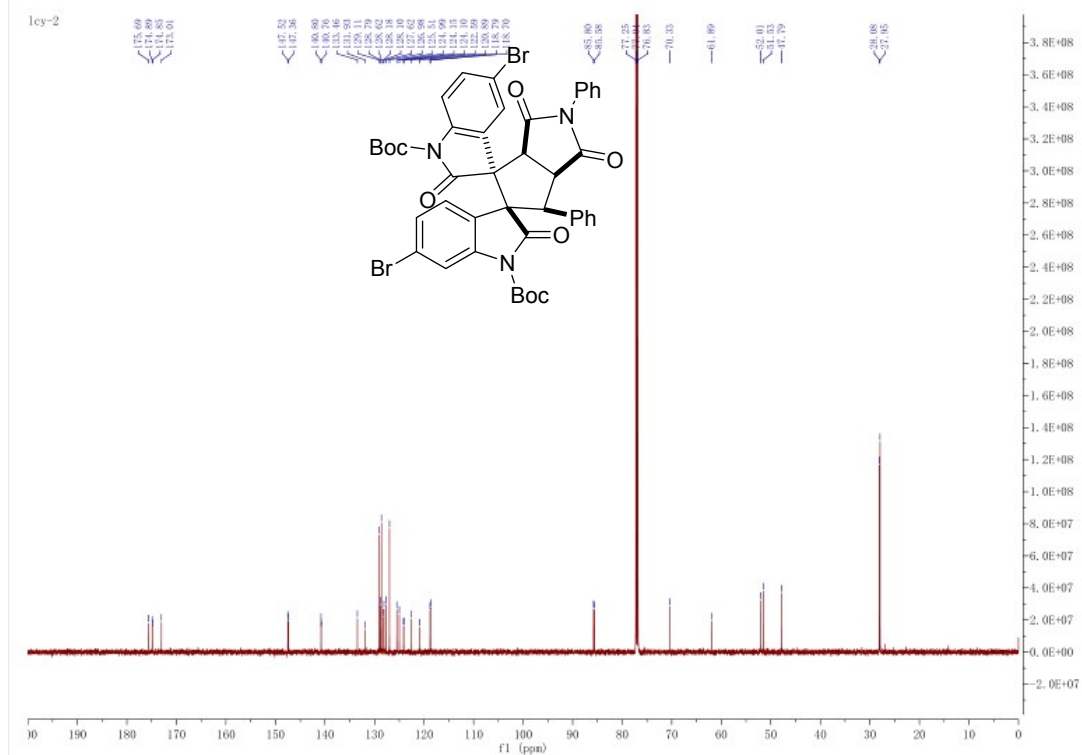





### Compound 3ab

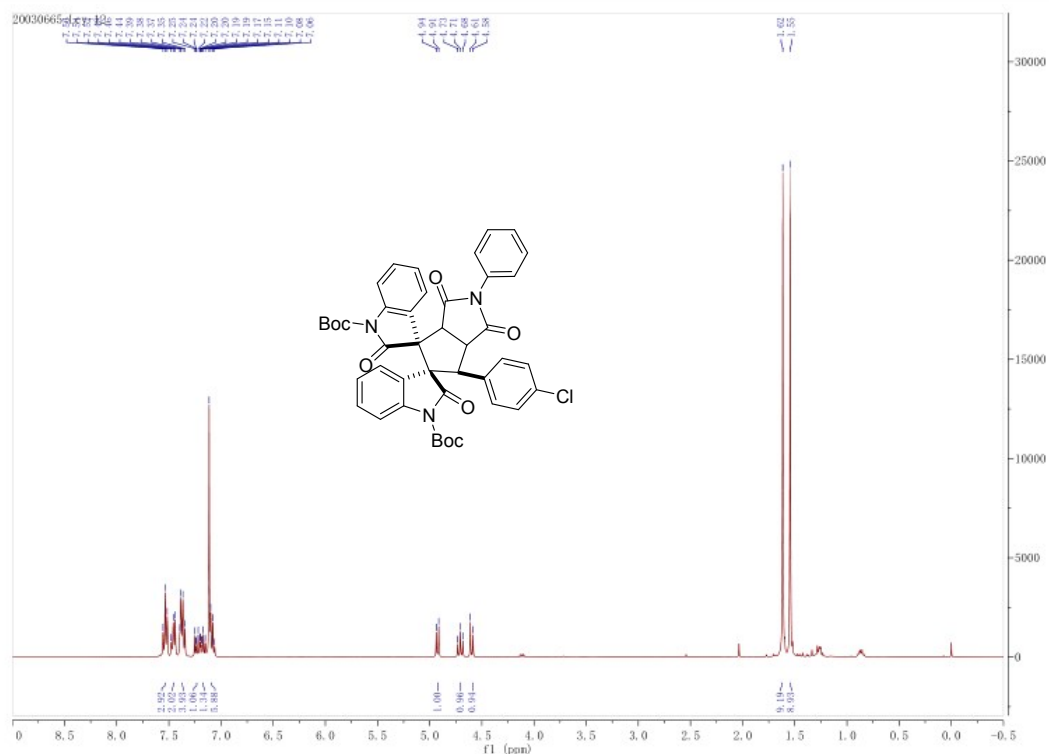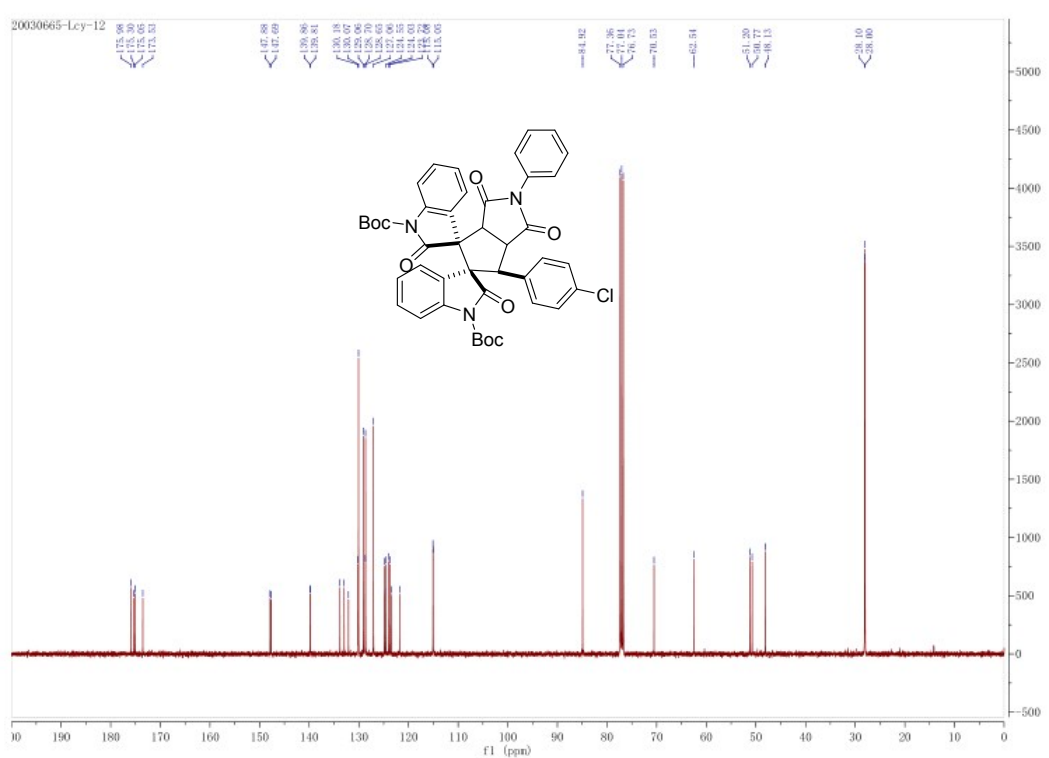

**Compound 3ac**

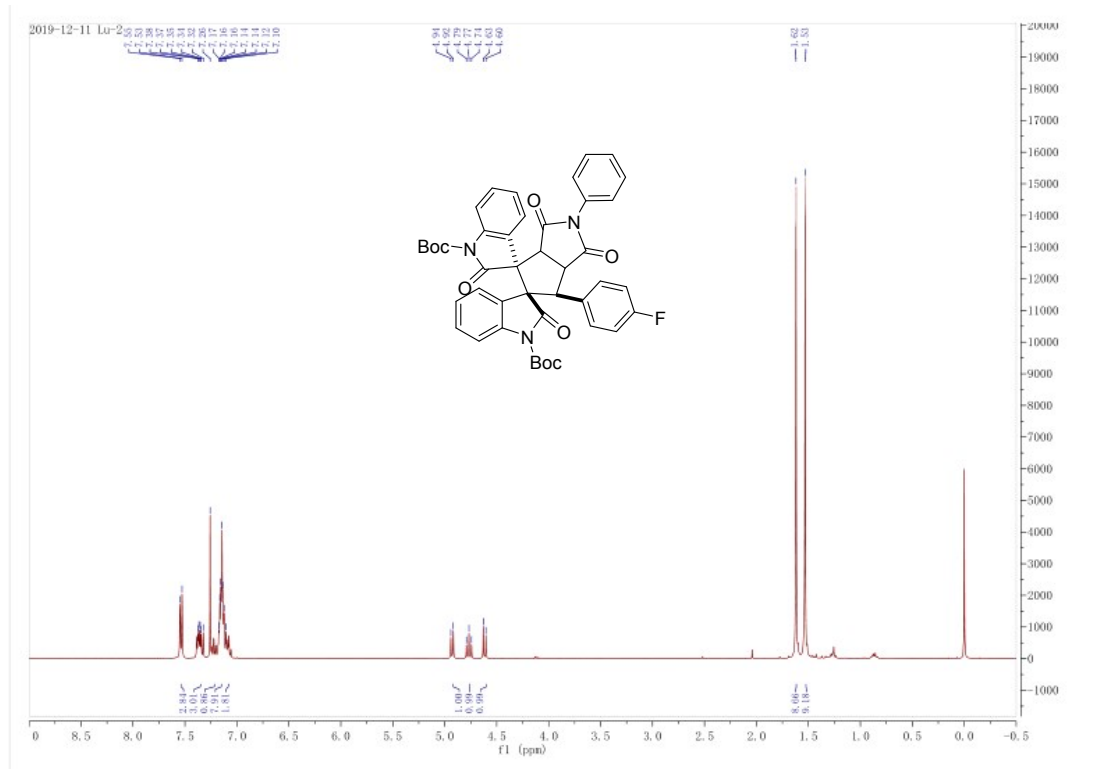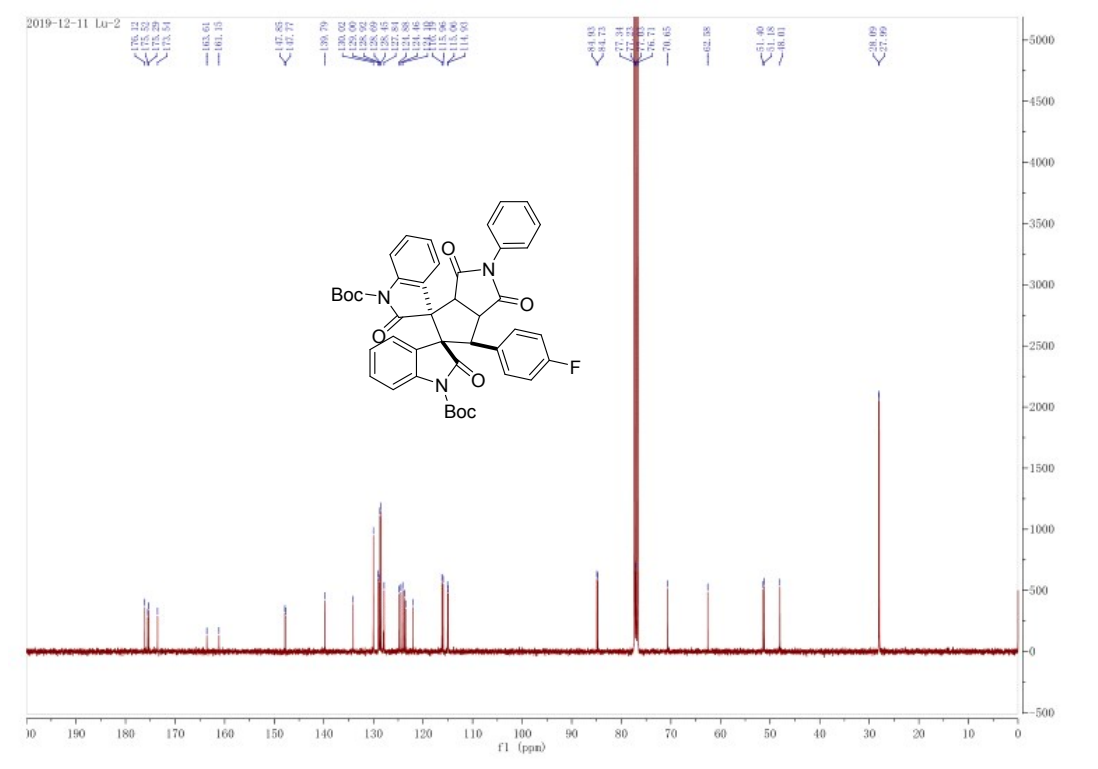

### Compound 3ad

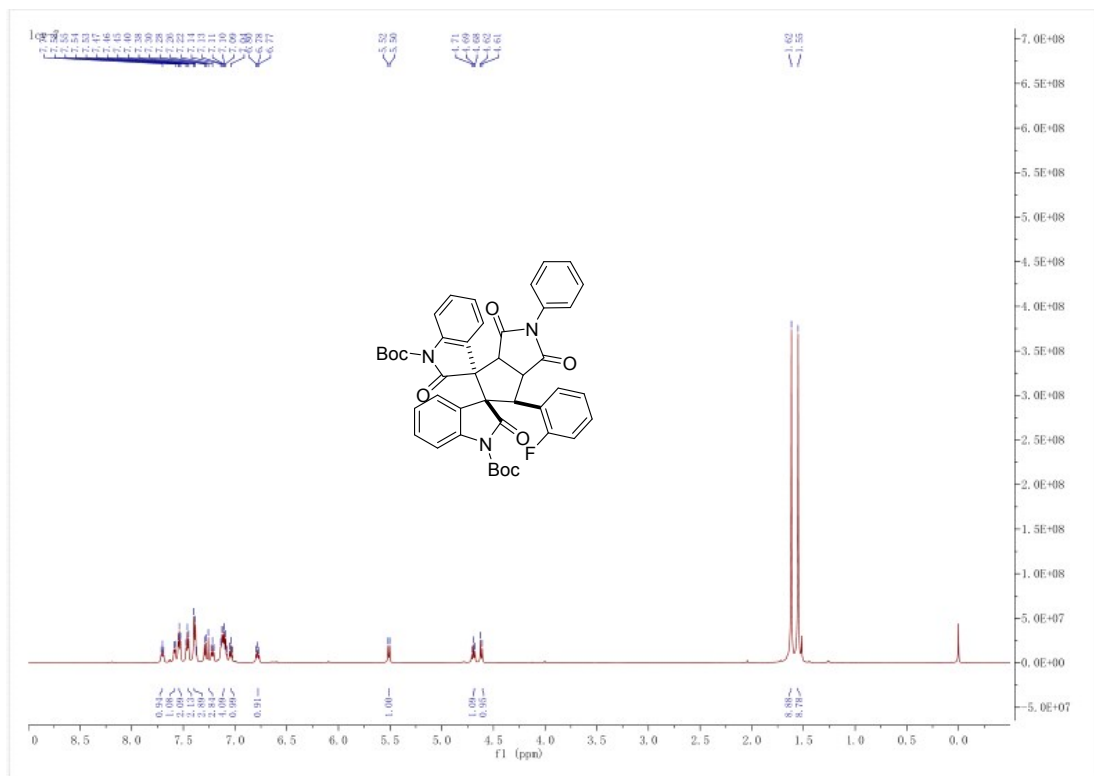



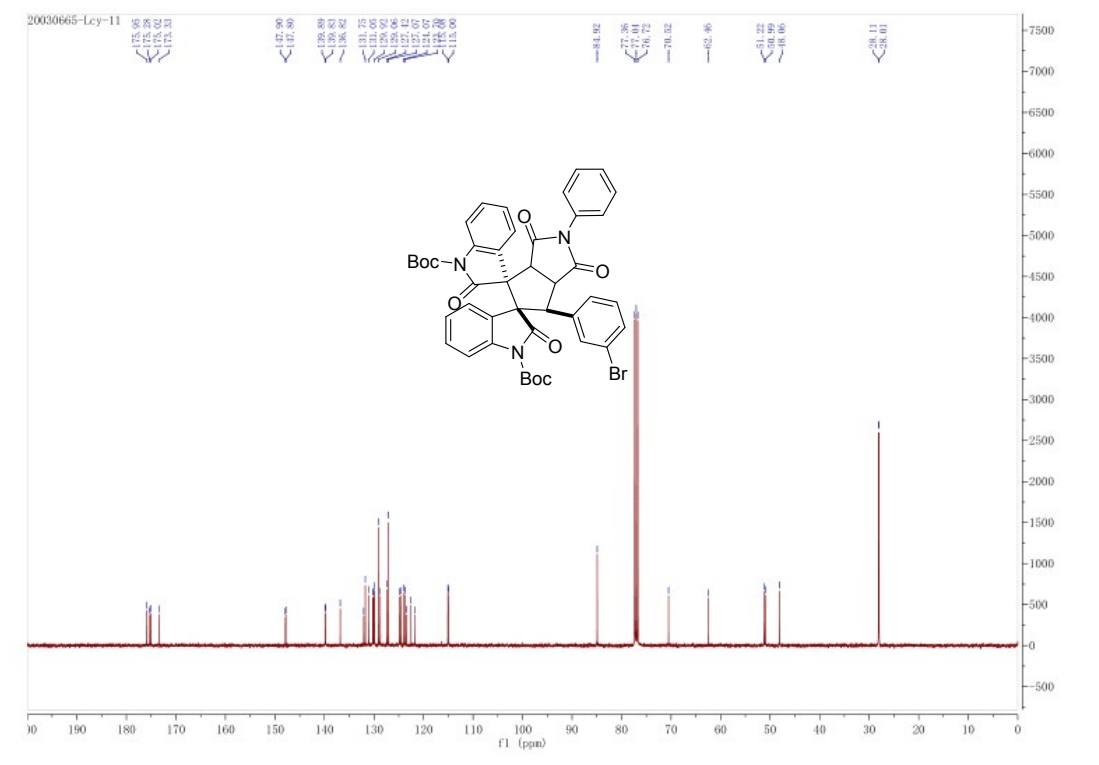

### Compound 3af

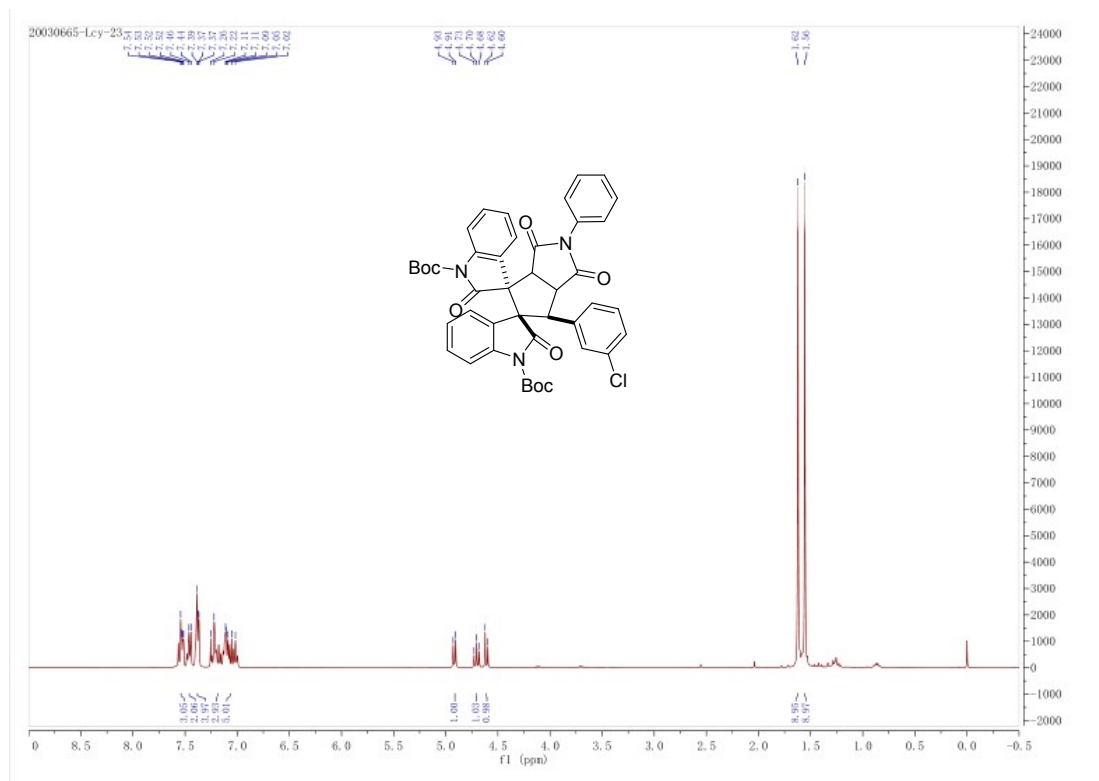



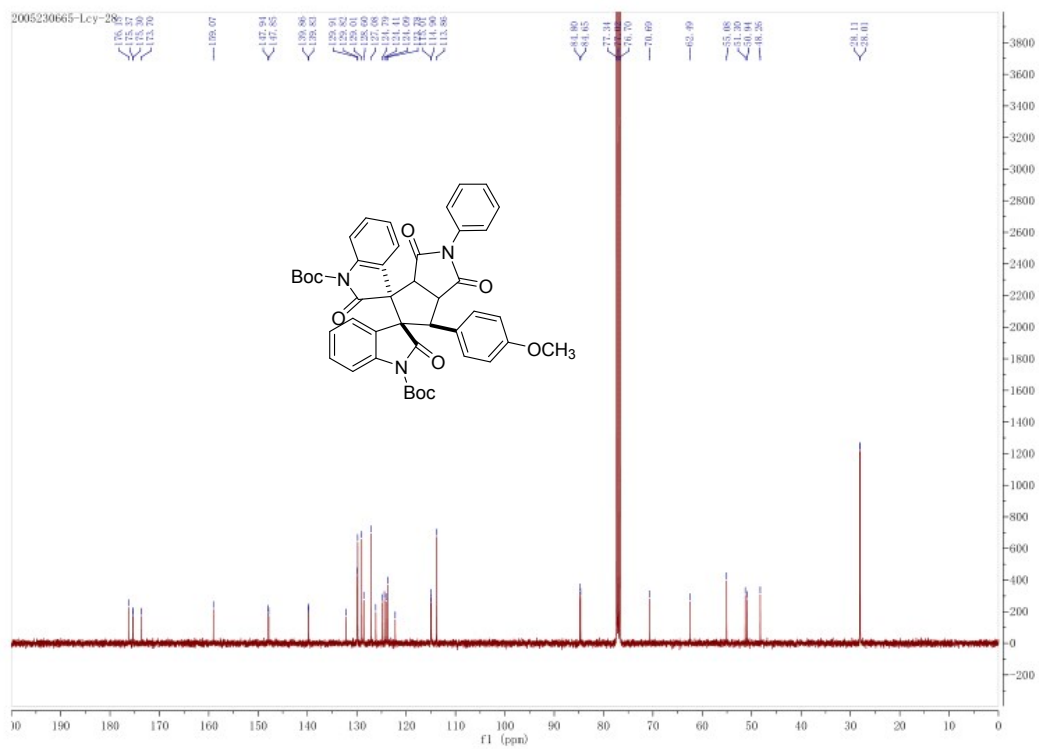

**Compound 3ah**

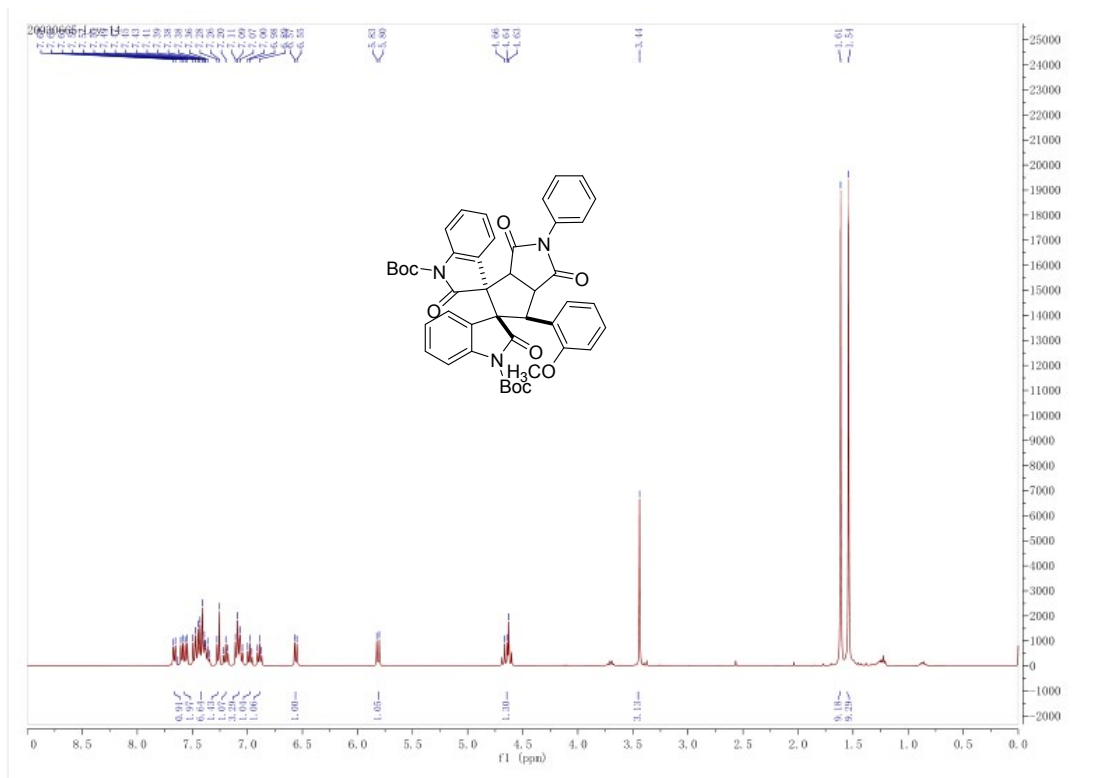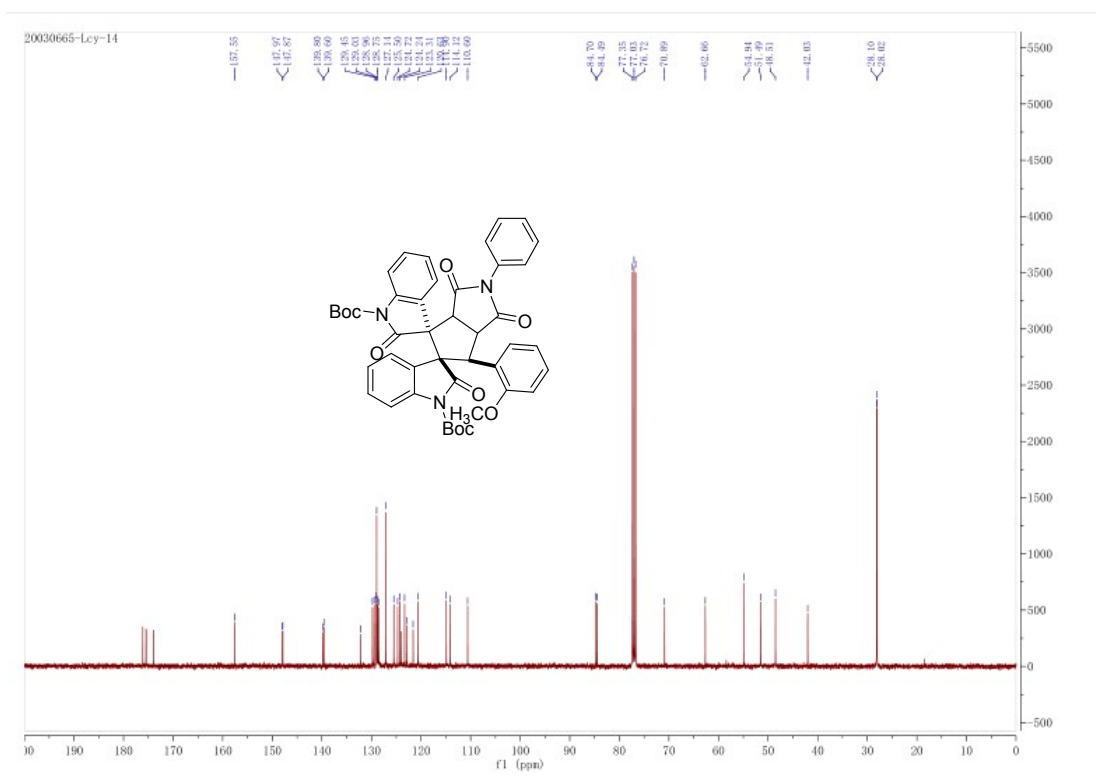

Compound 3ai



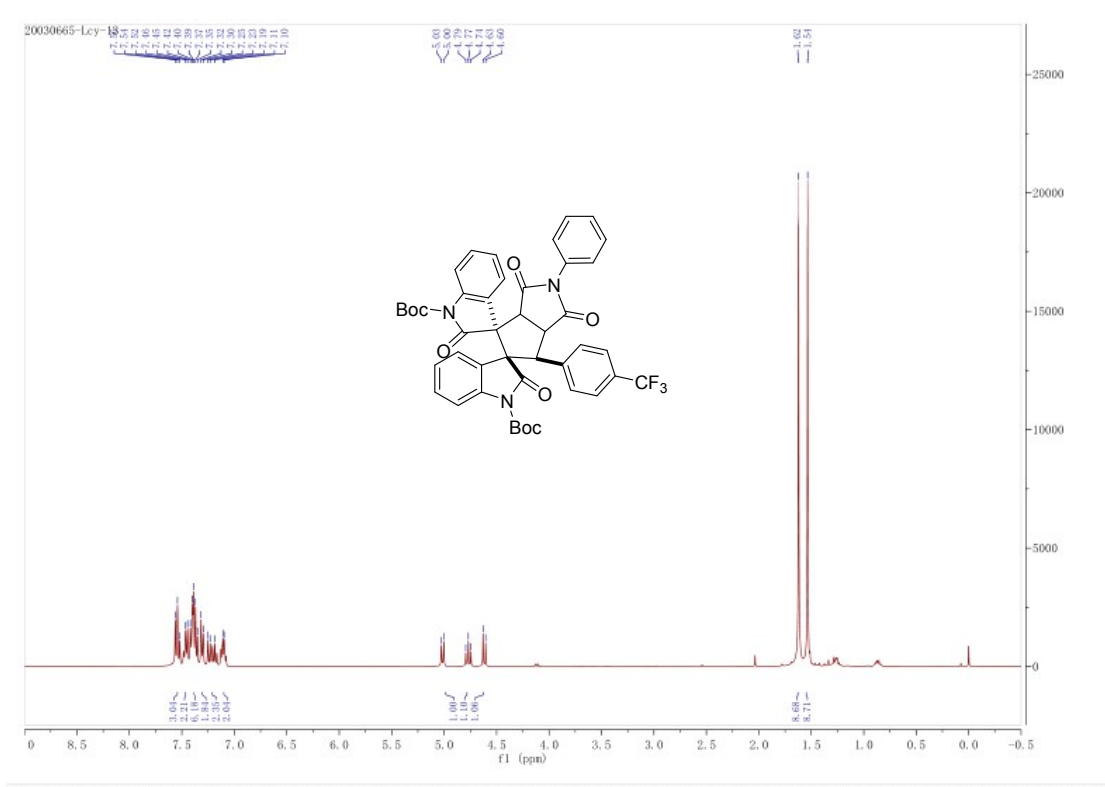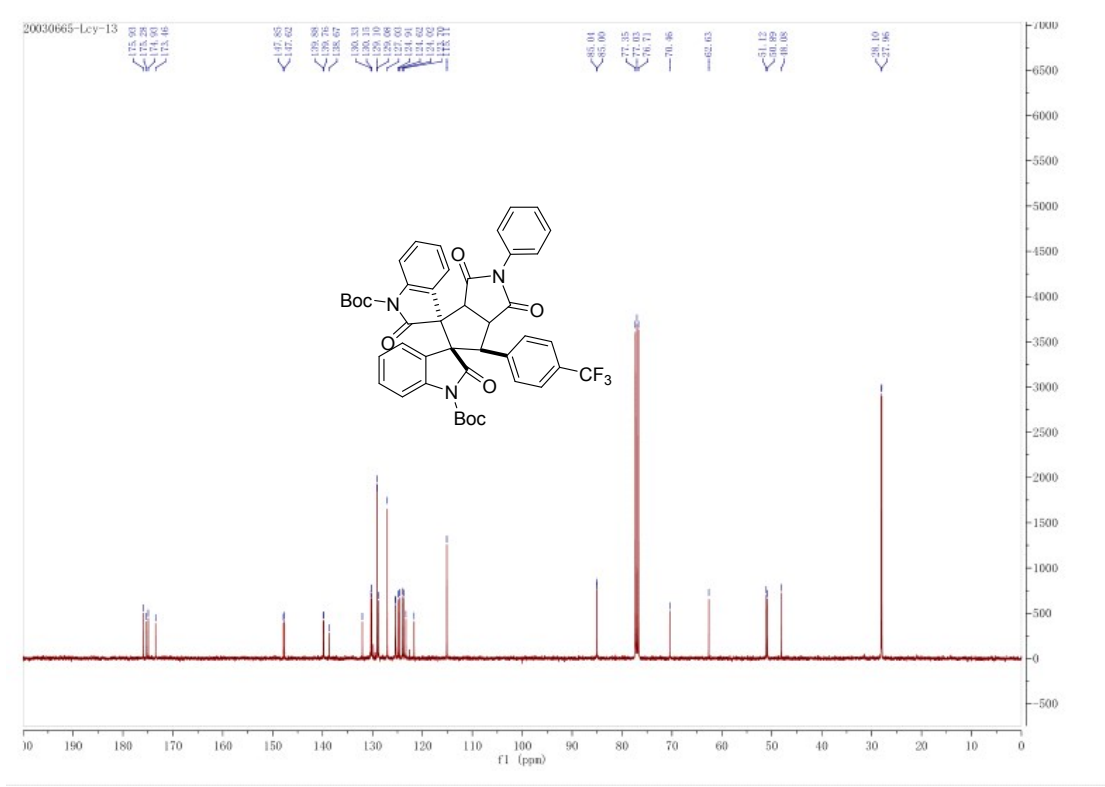

### Compound 3aj

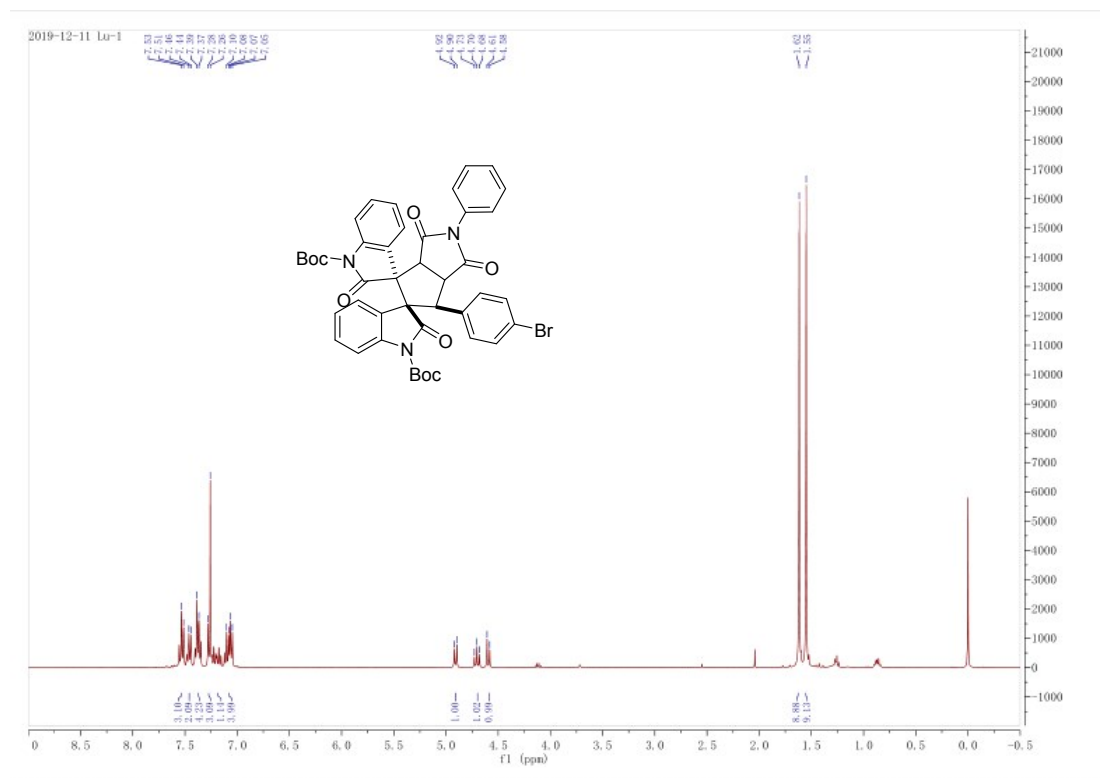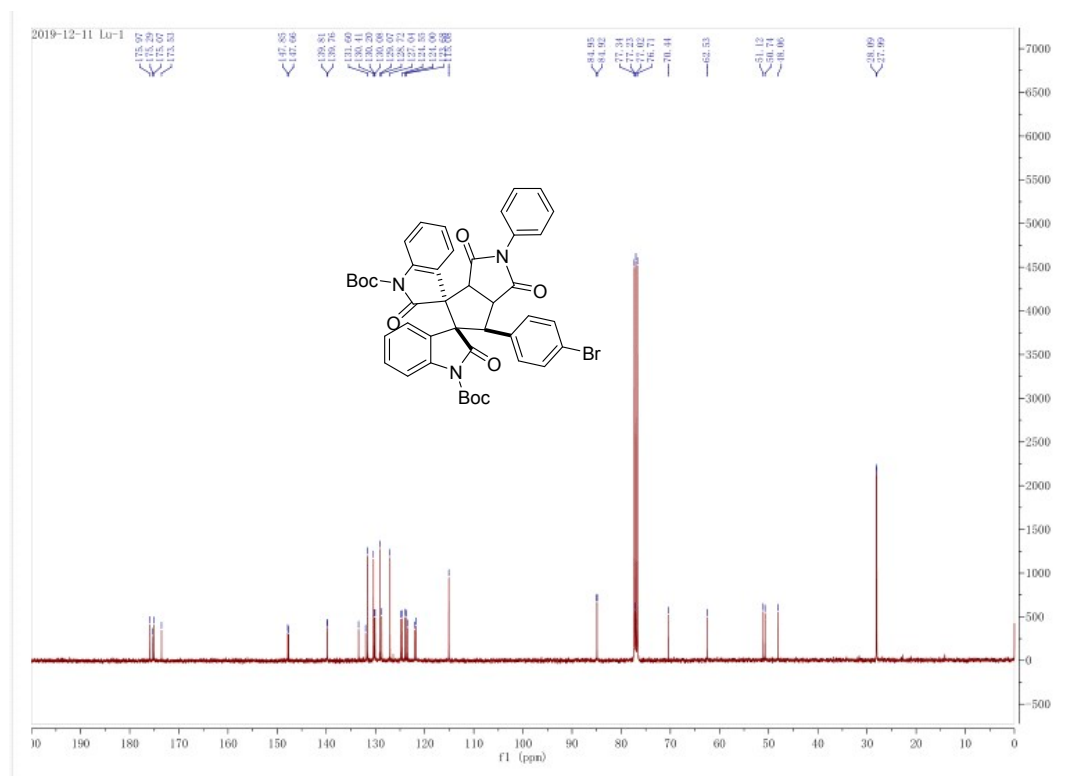

**Compound 3ak**

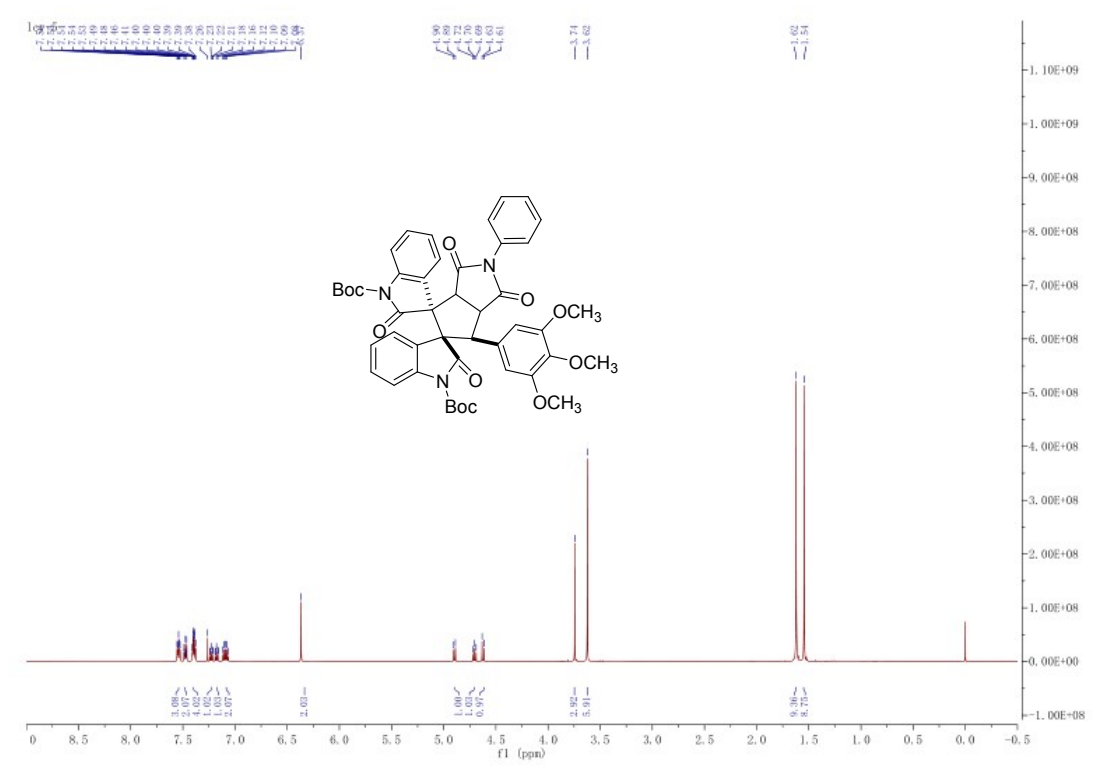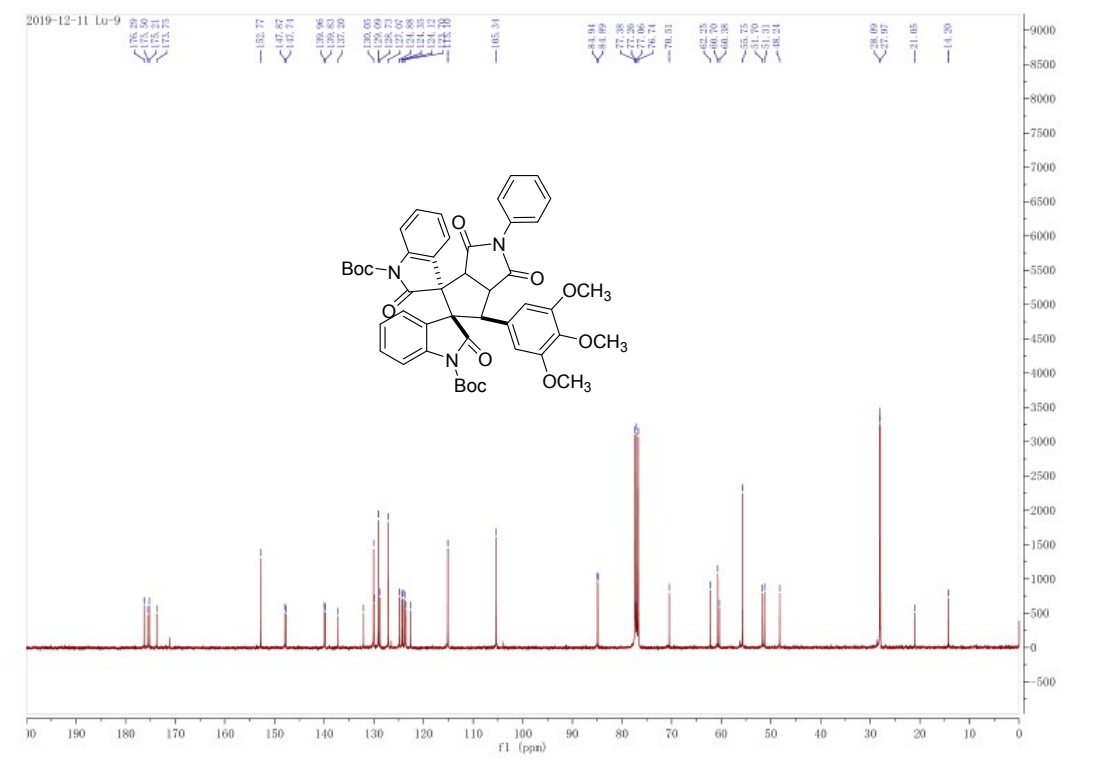

Compound 3aI

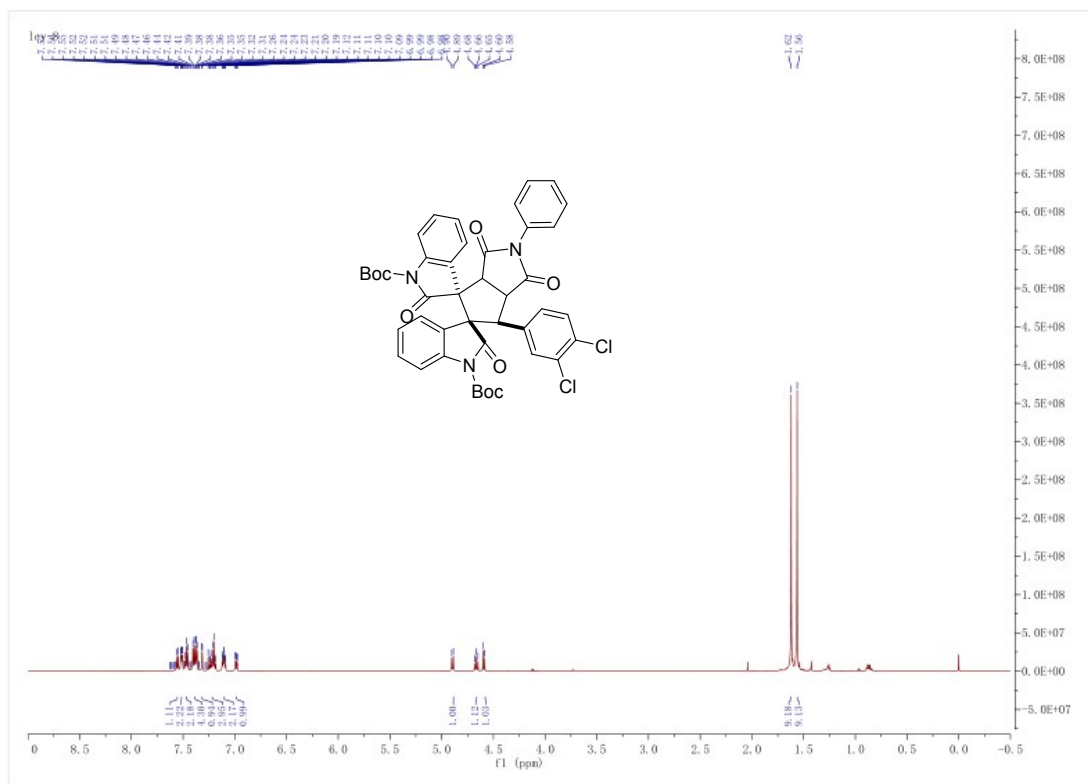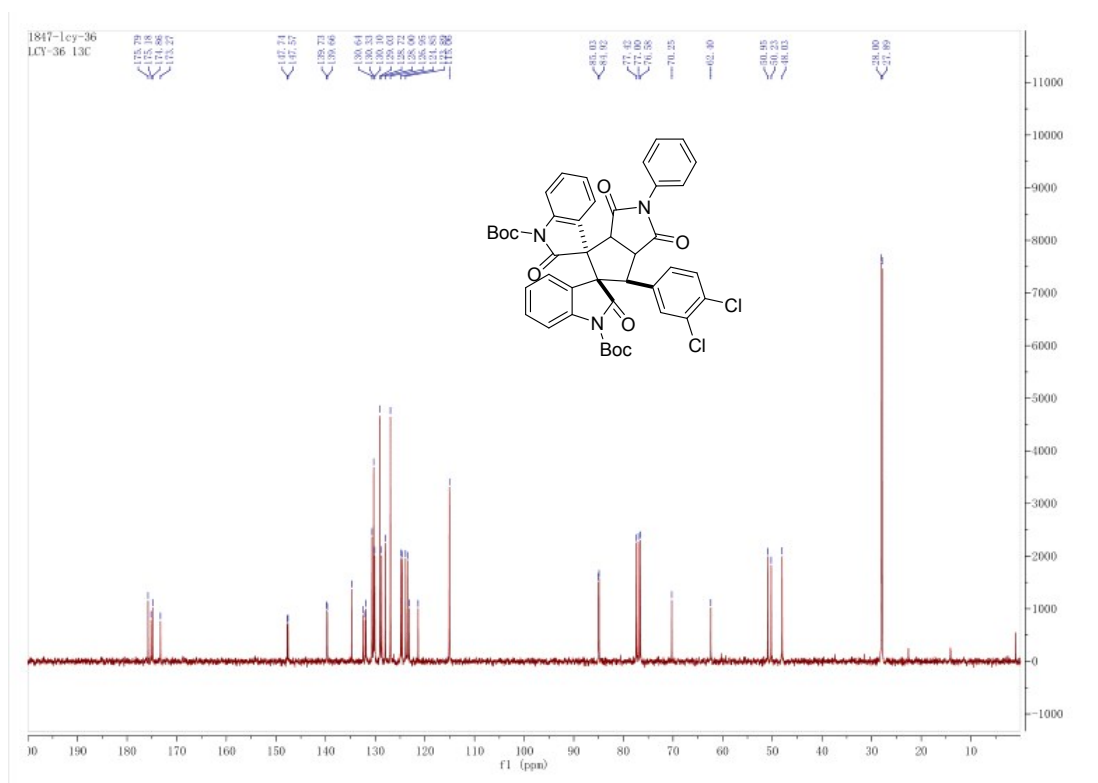

### Compound 3am

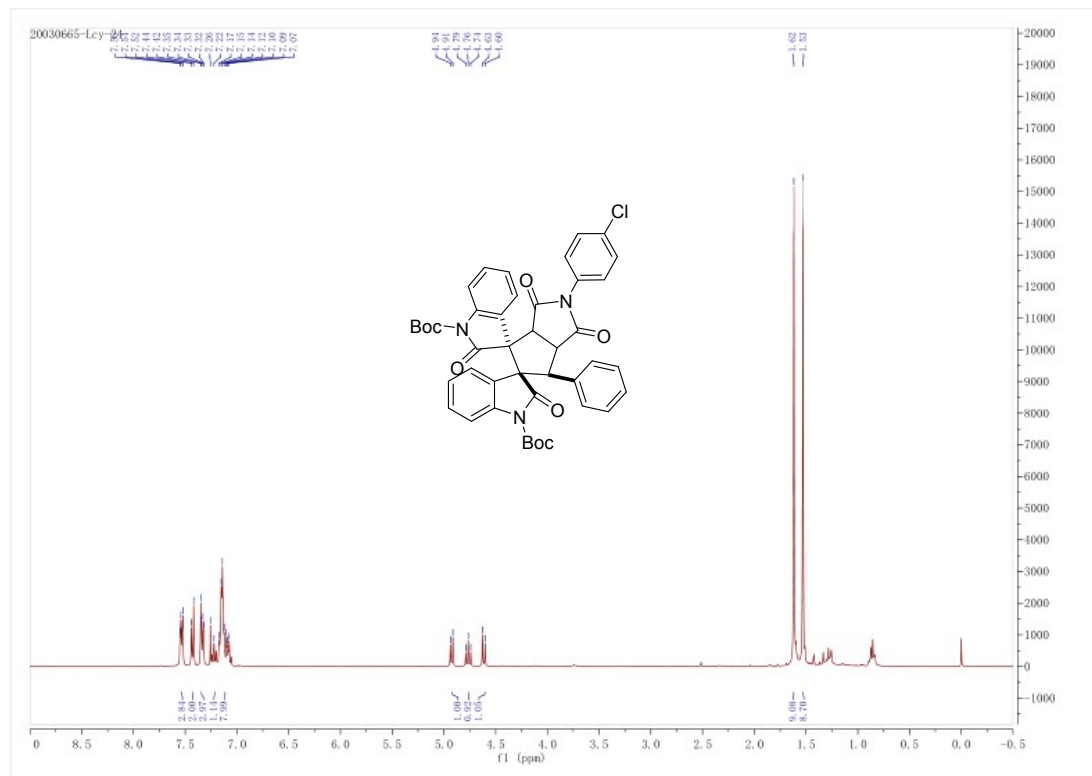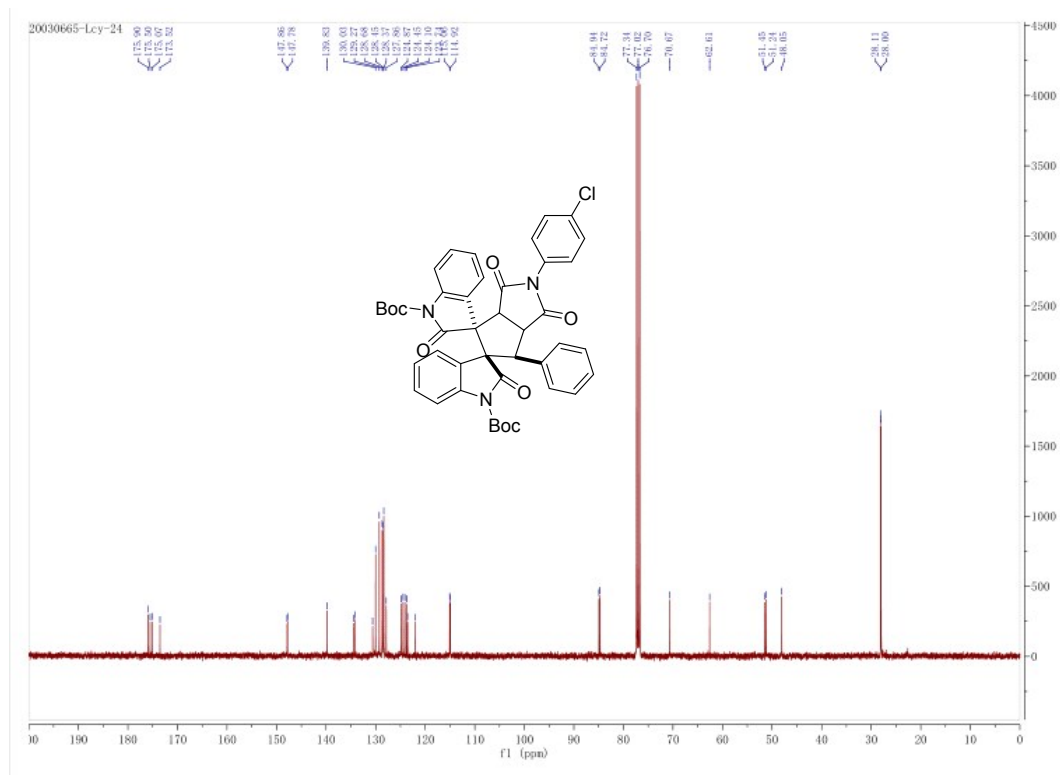

### Compound 3an

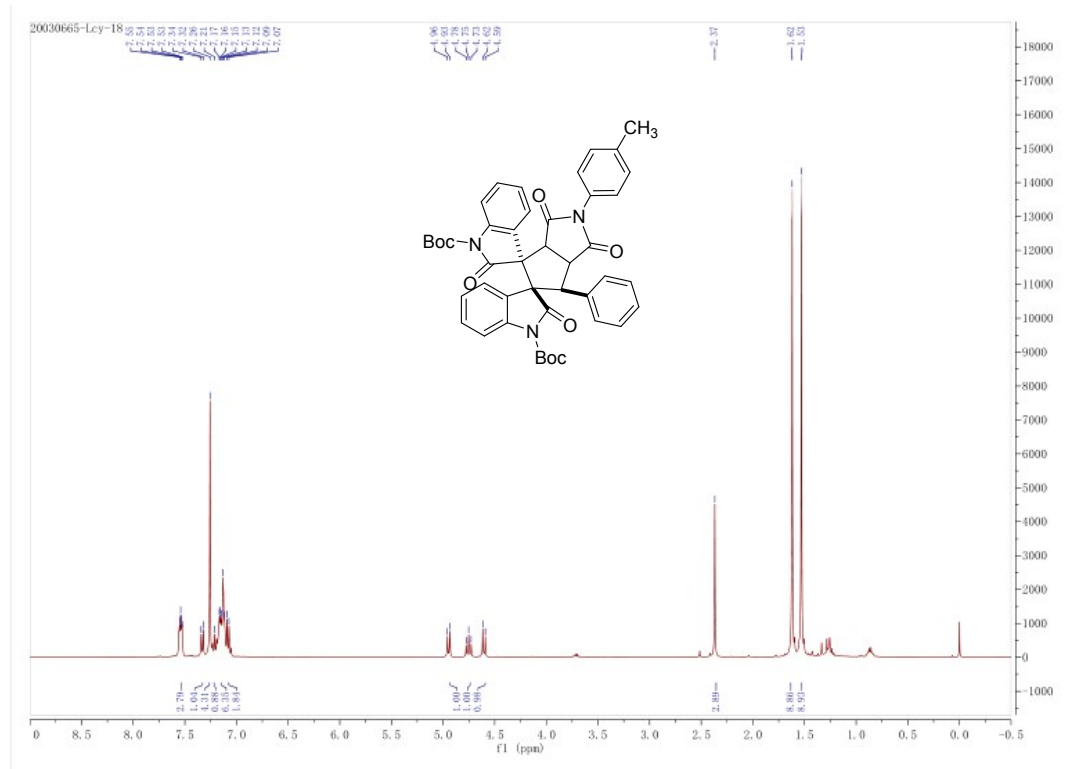

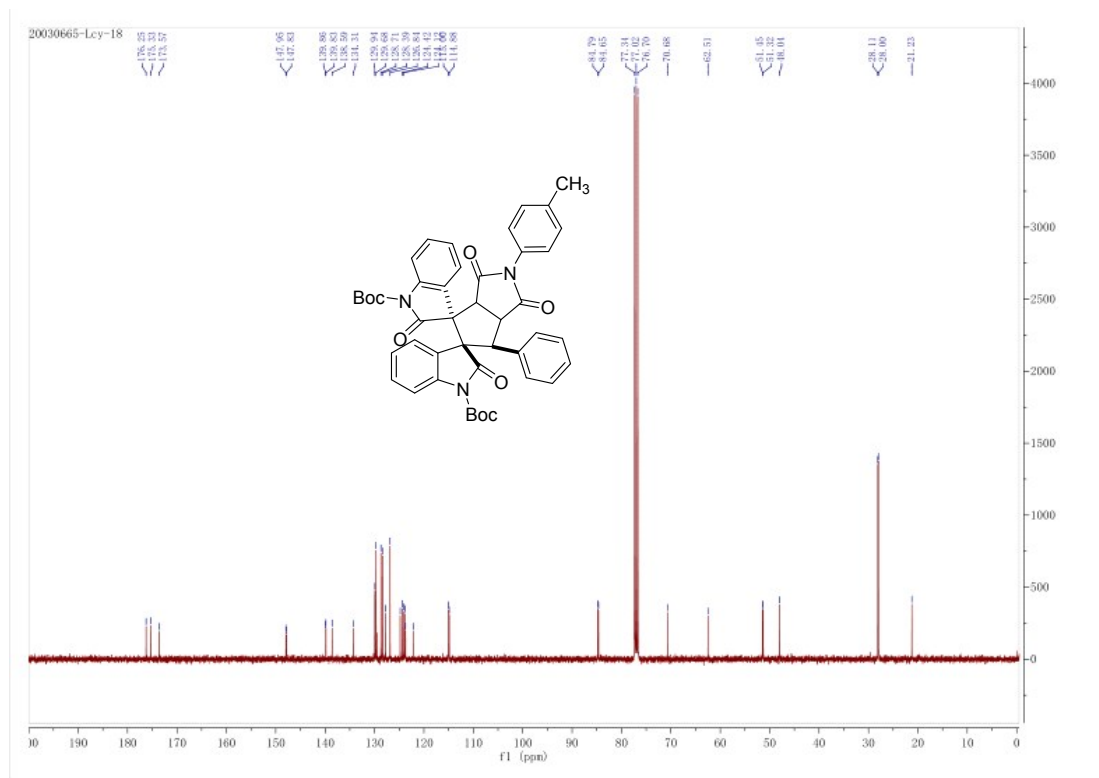

### Compound 3ao

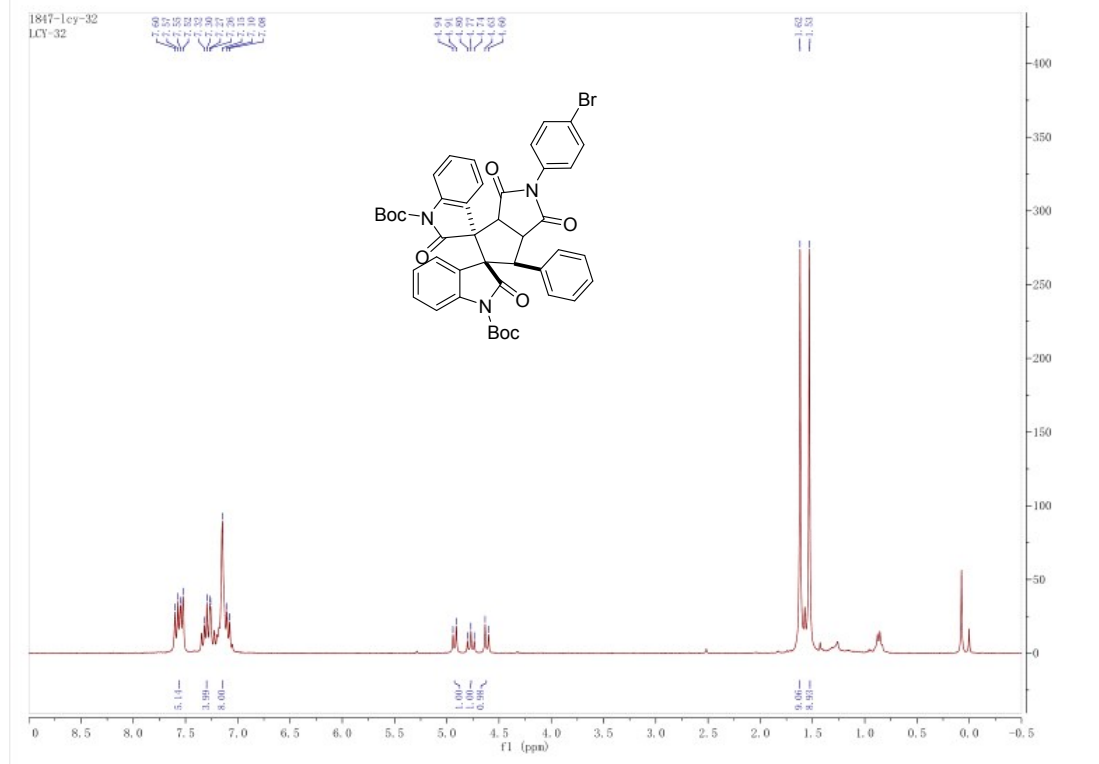

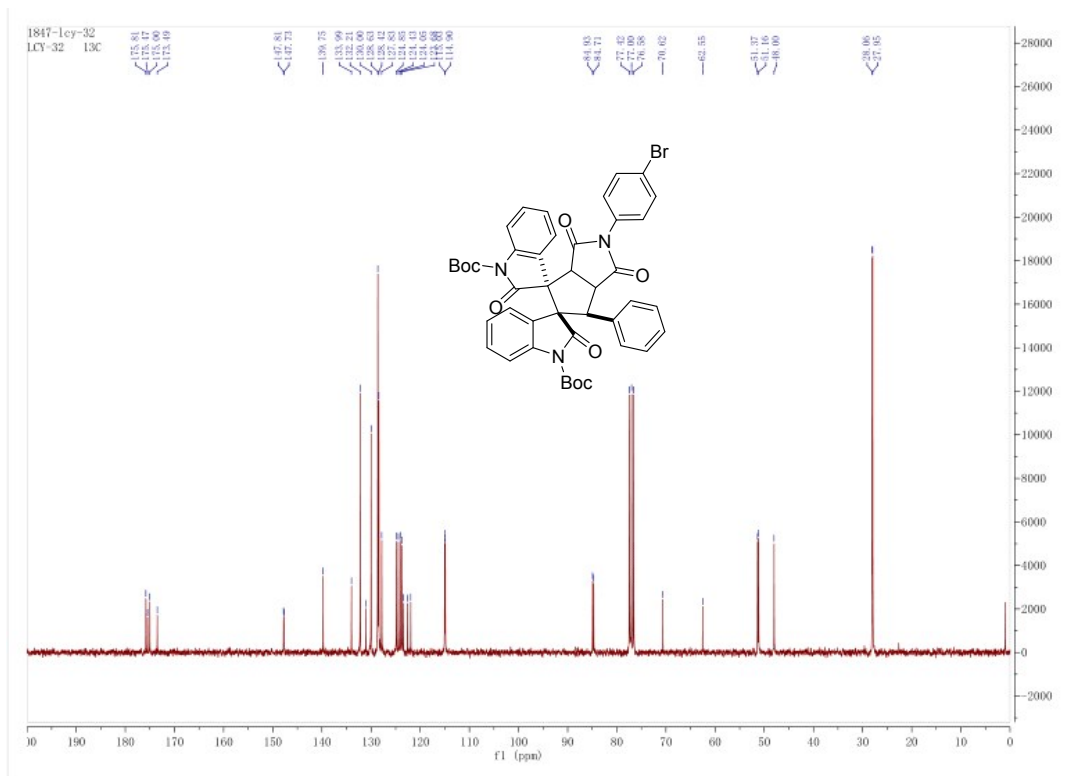

### Compound 3ap

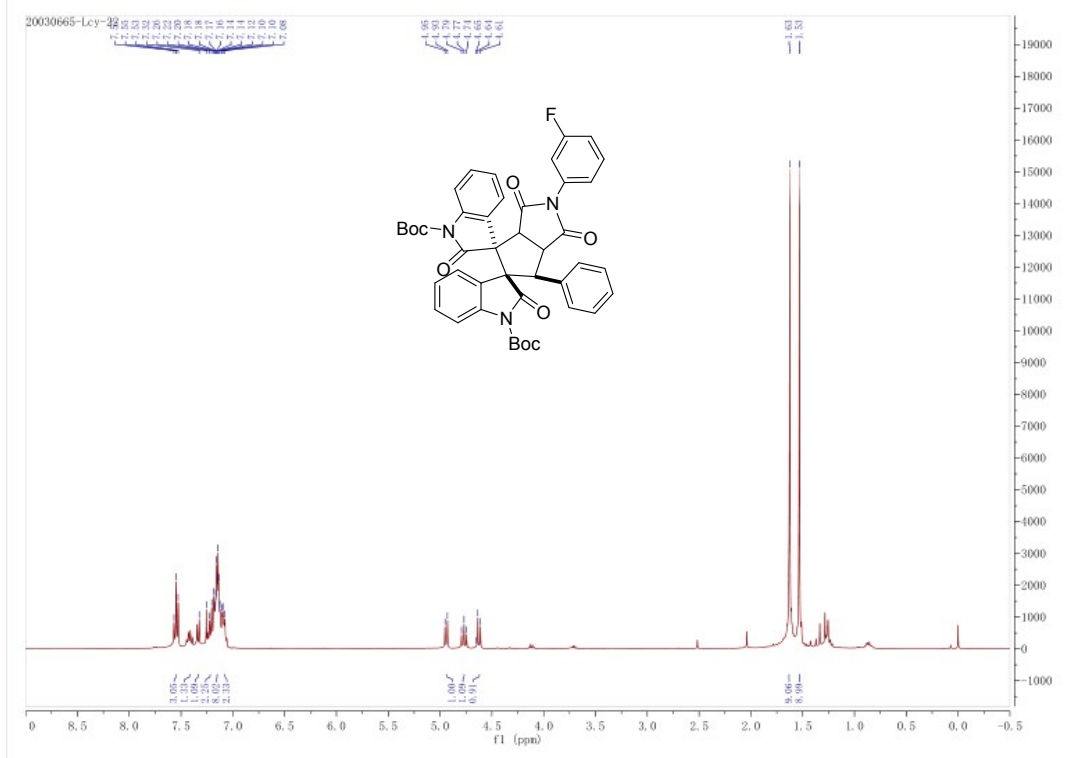



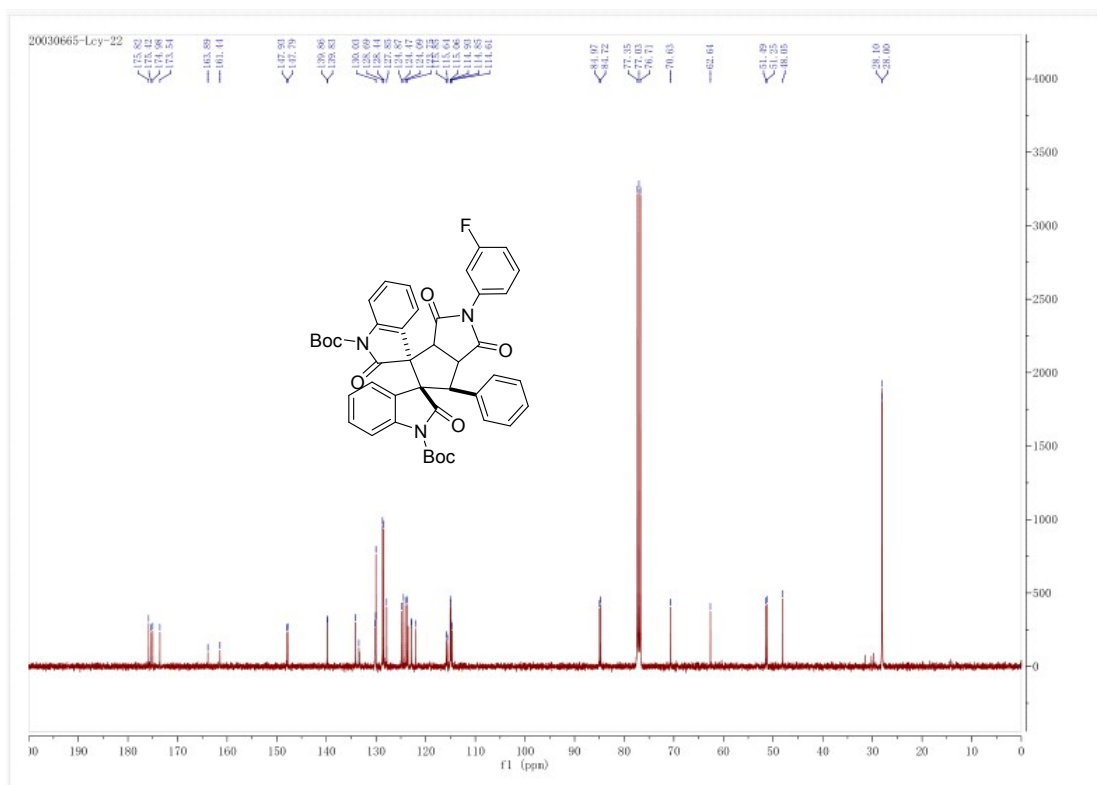

Compound 3aq

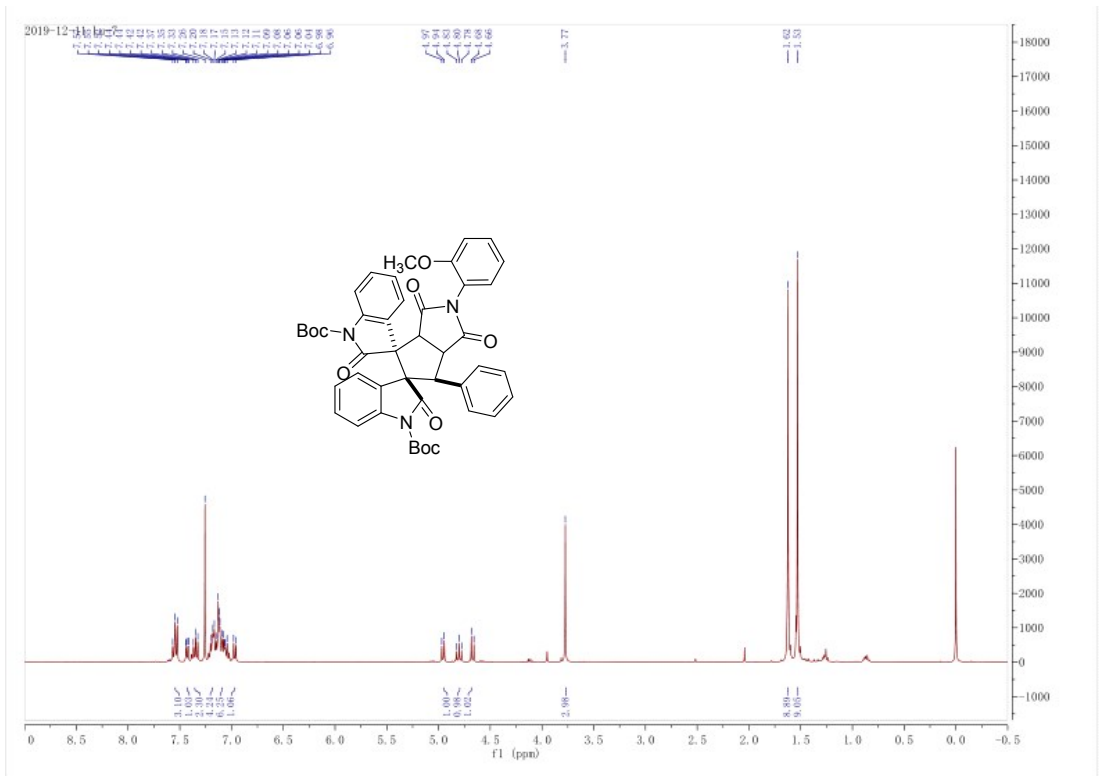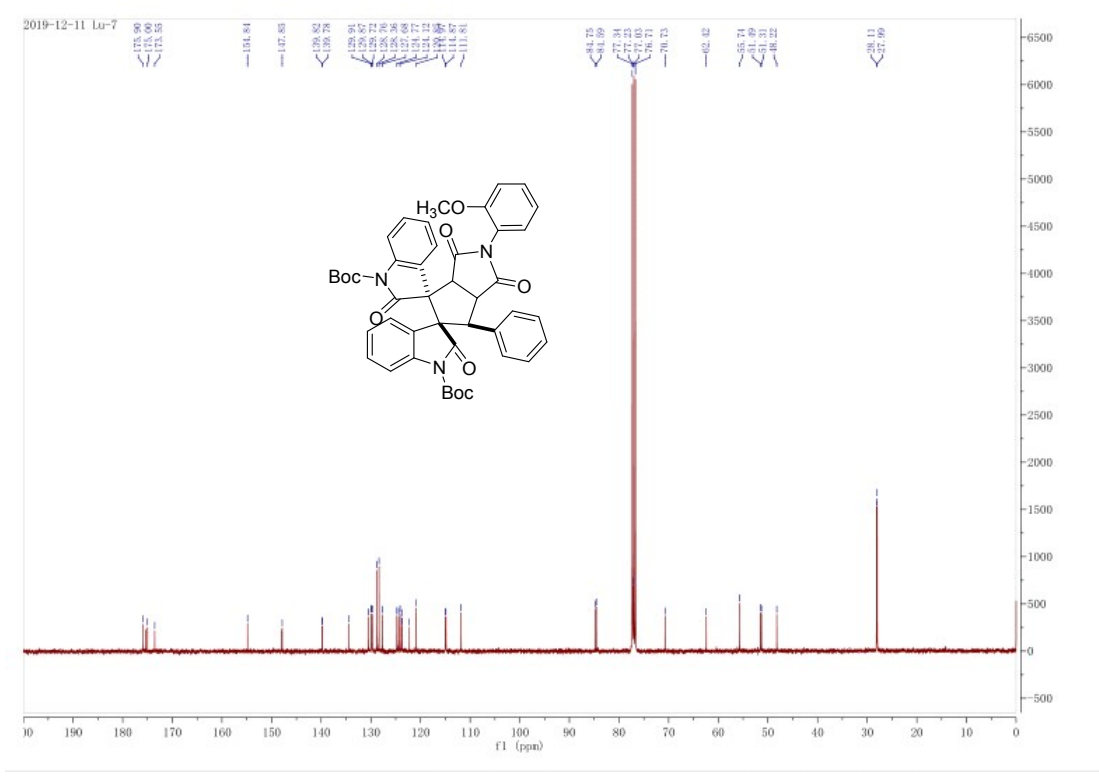

# Compound 3ar

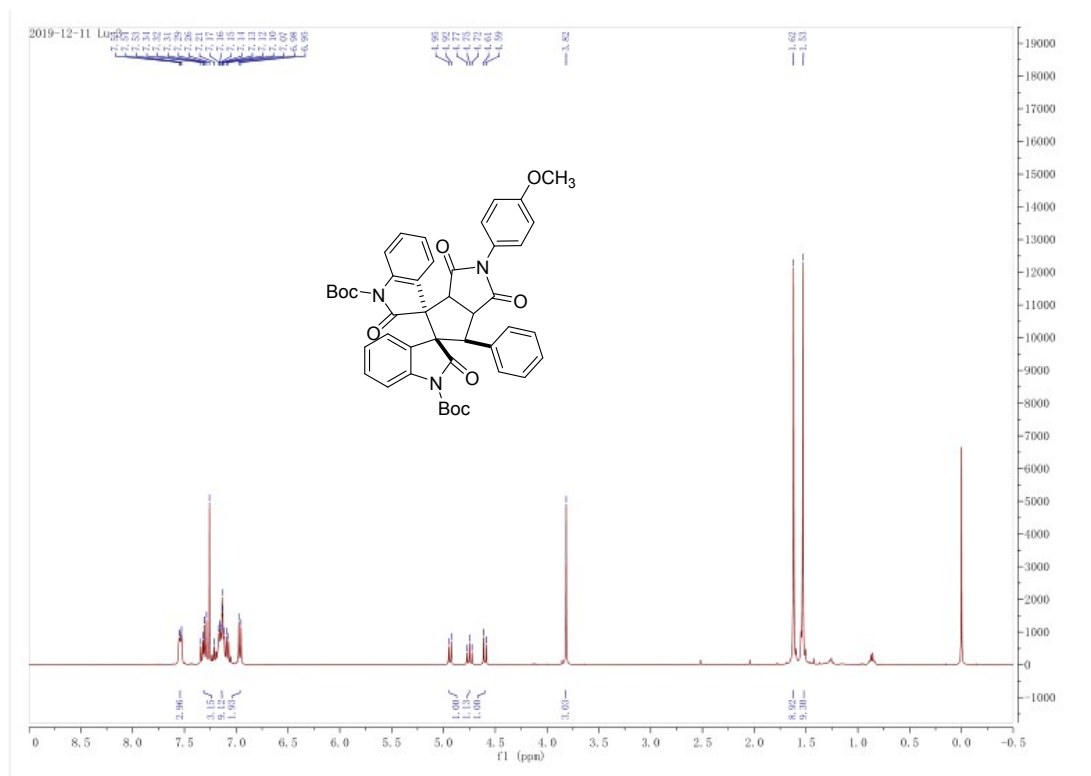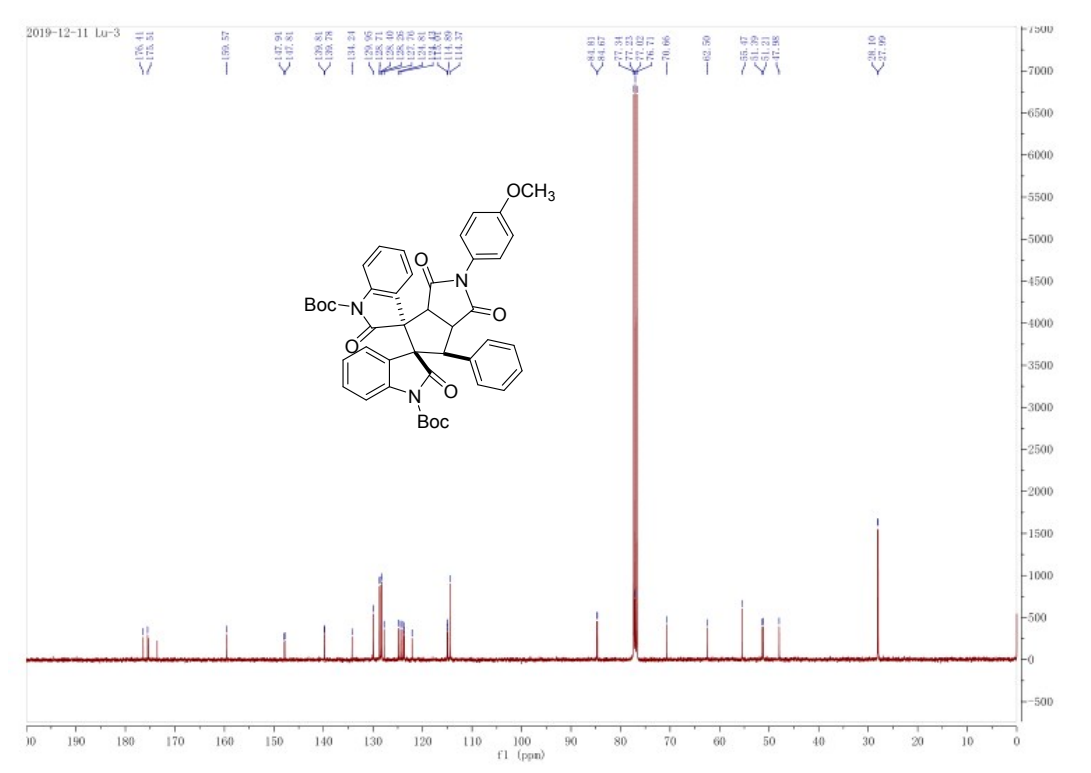

### Compound 3as

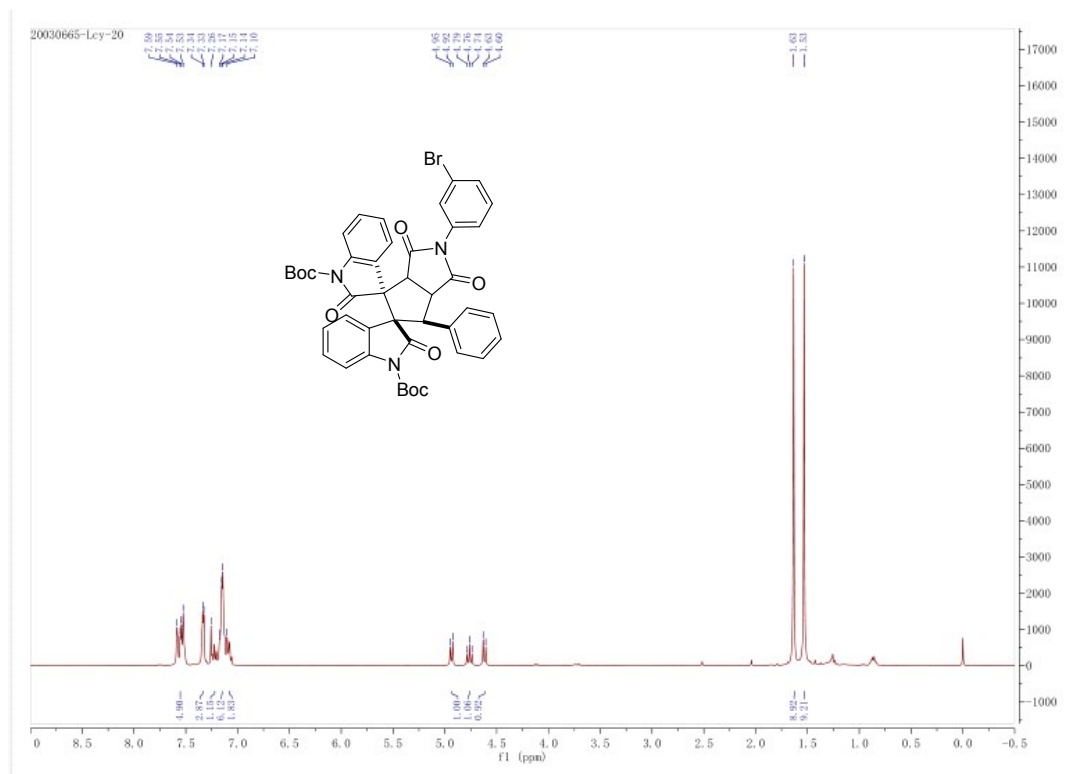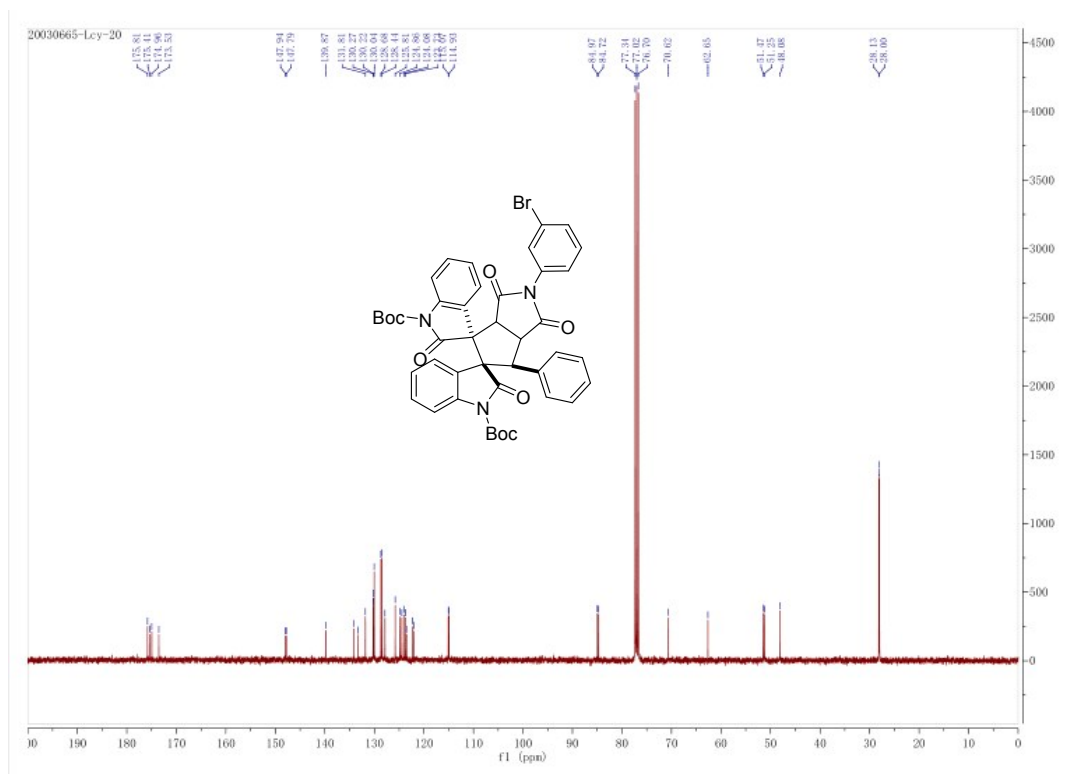

# Compound 3at

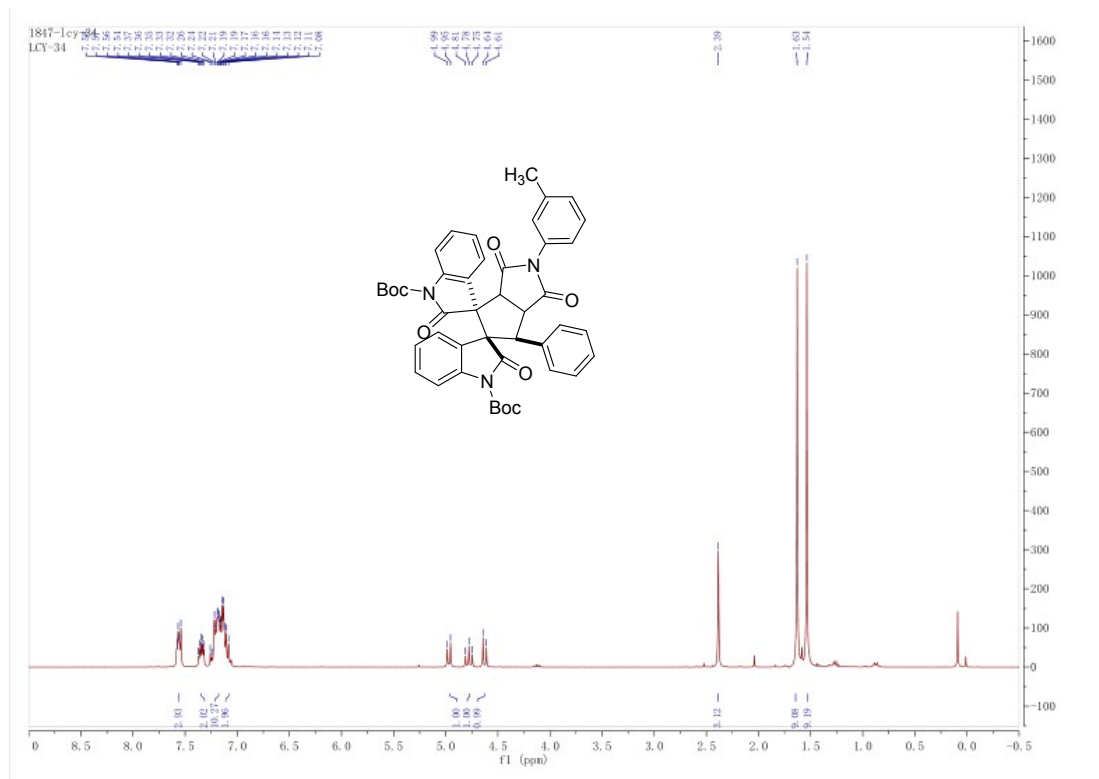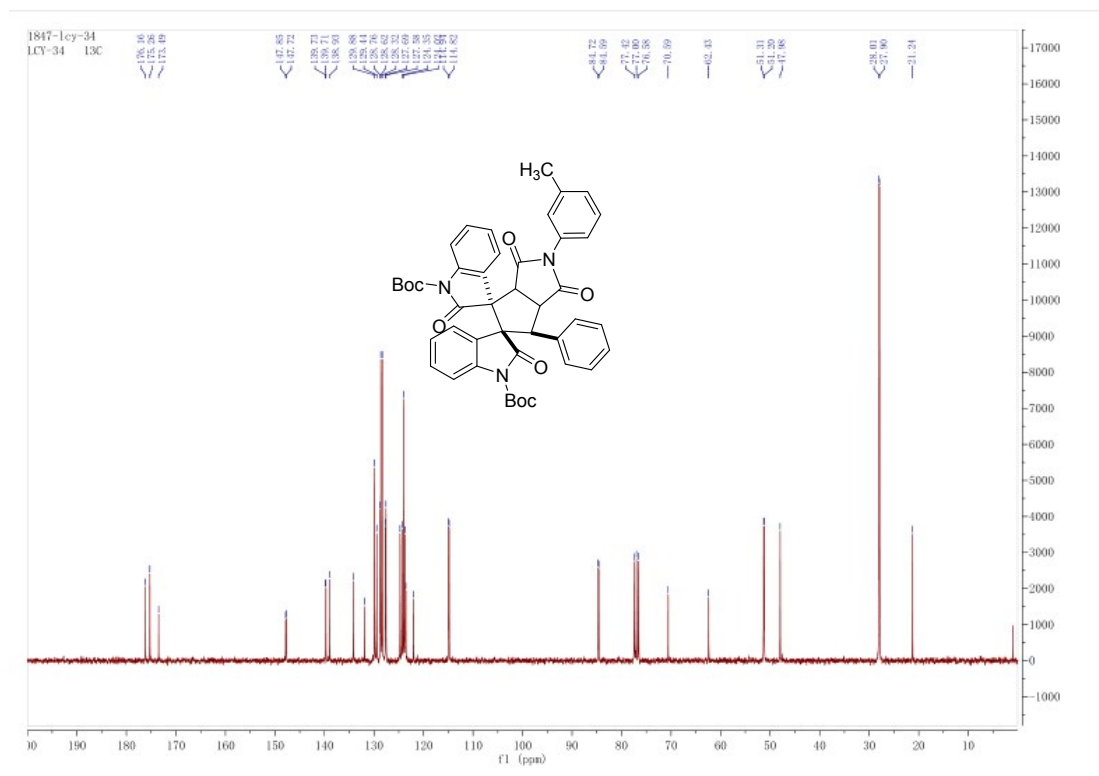

Compound 3au (dr 3:1 mixture)

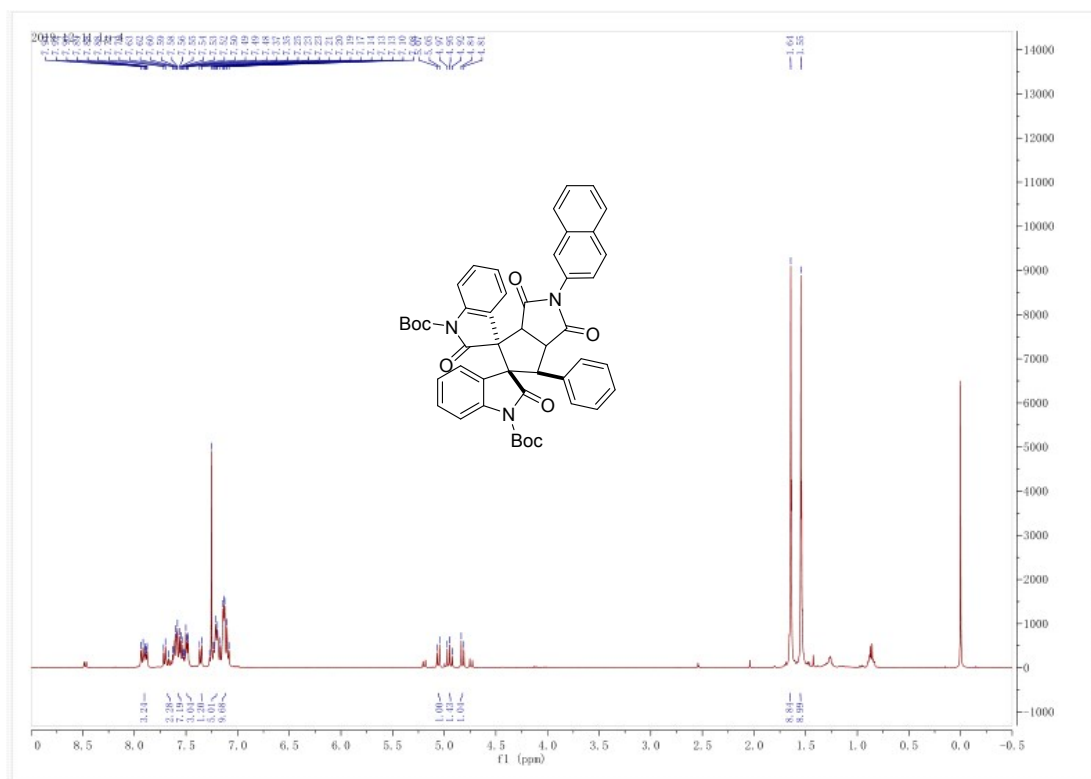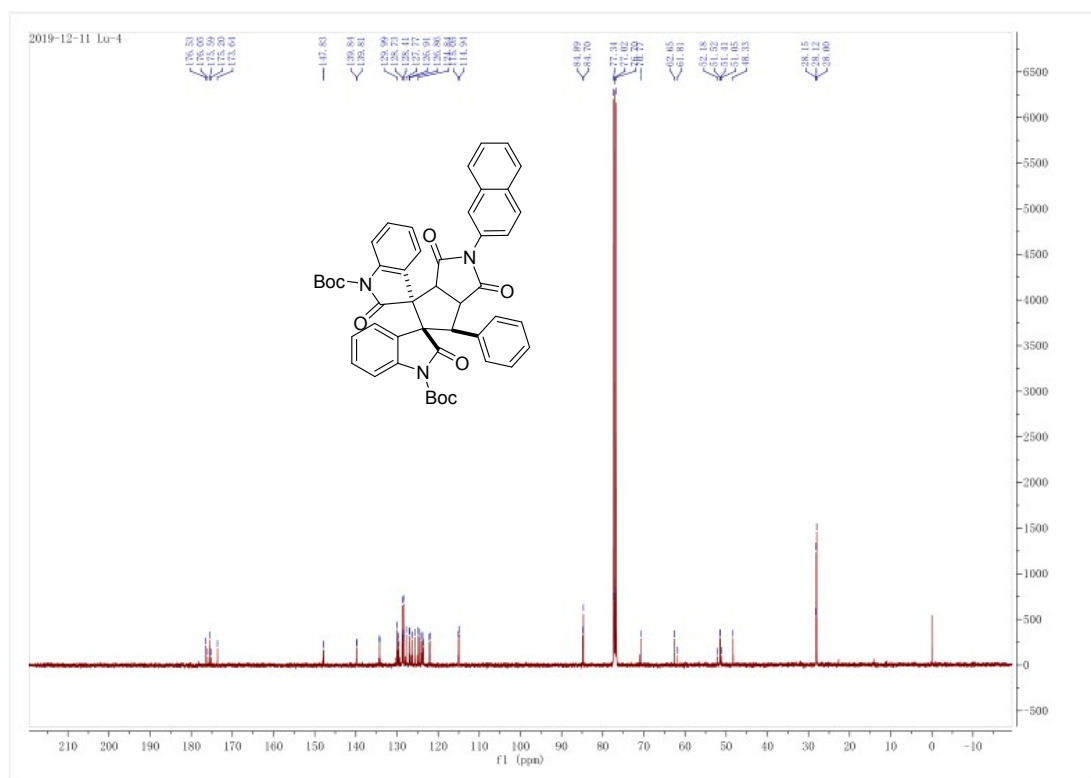

Compound 3av

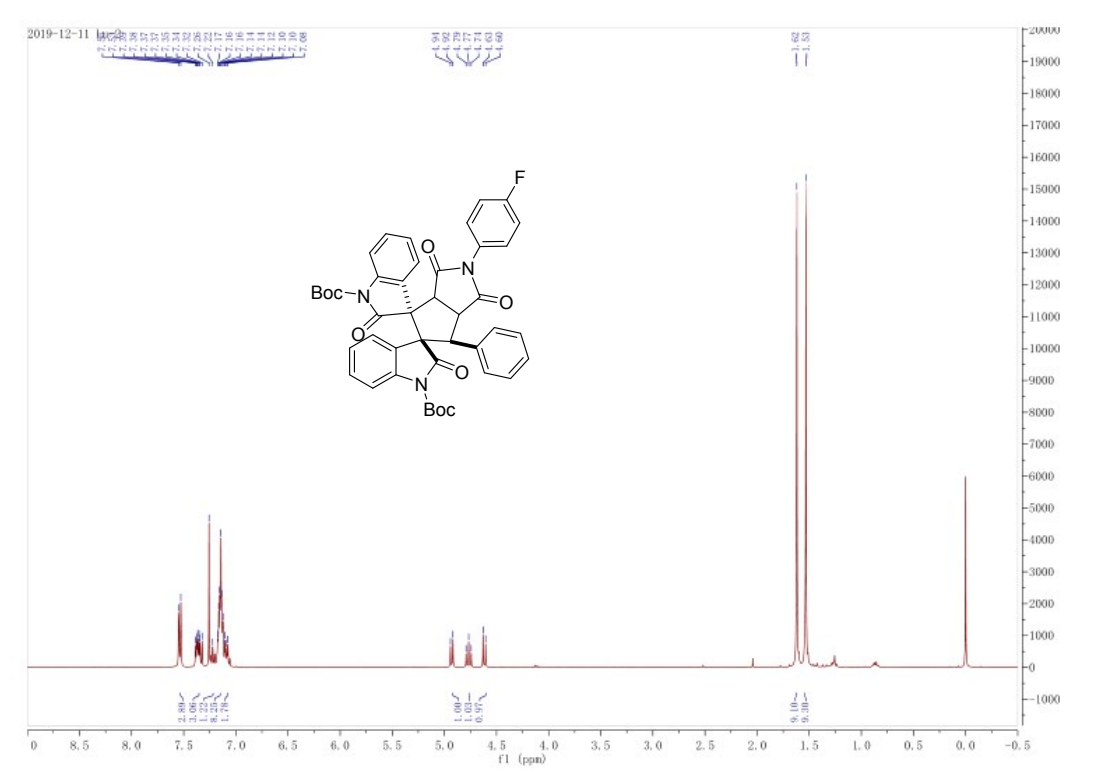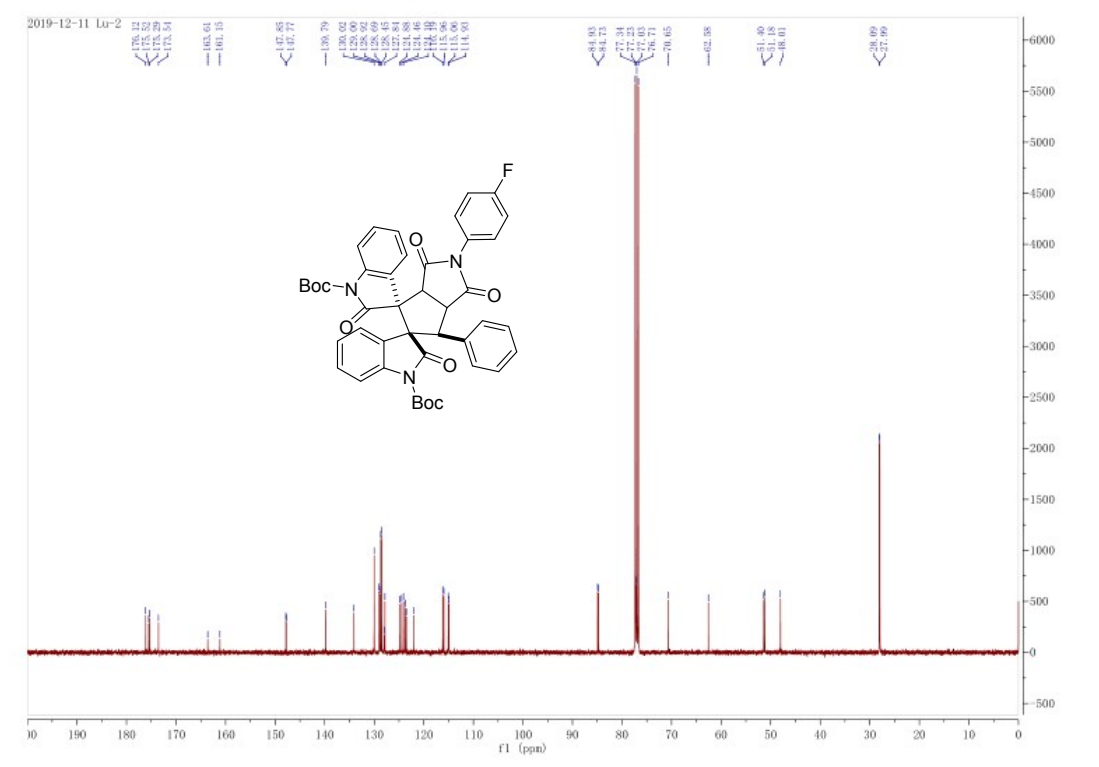

**Compound 3aw**

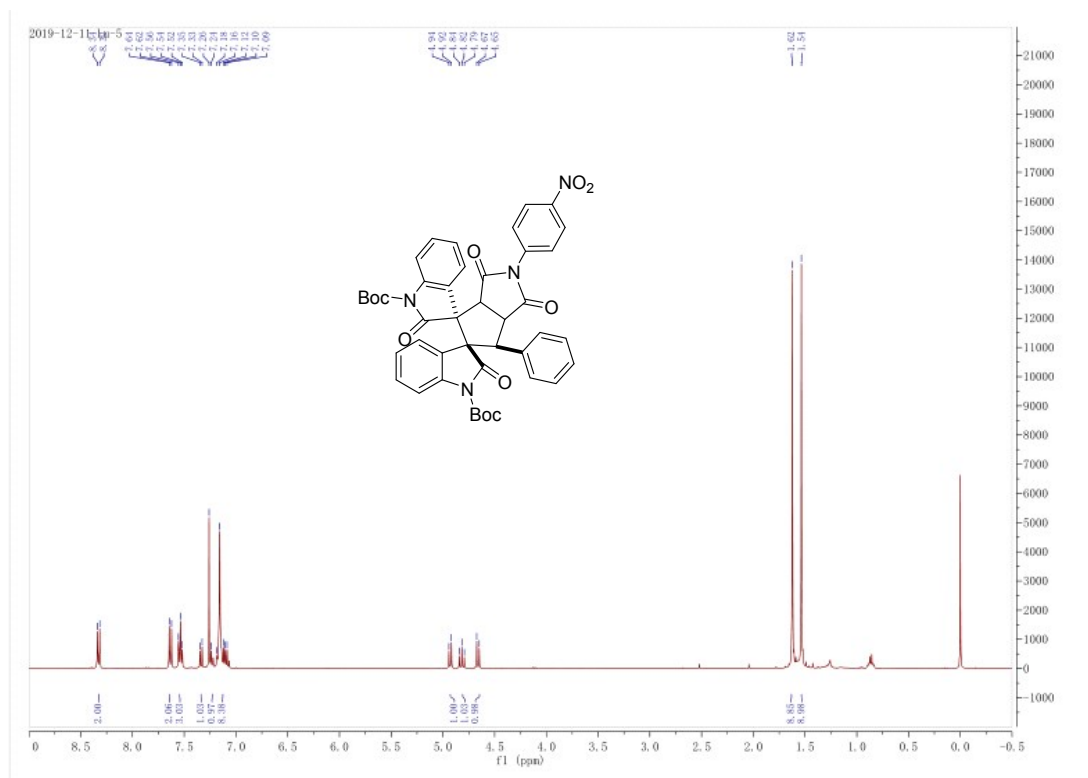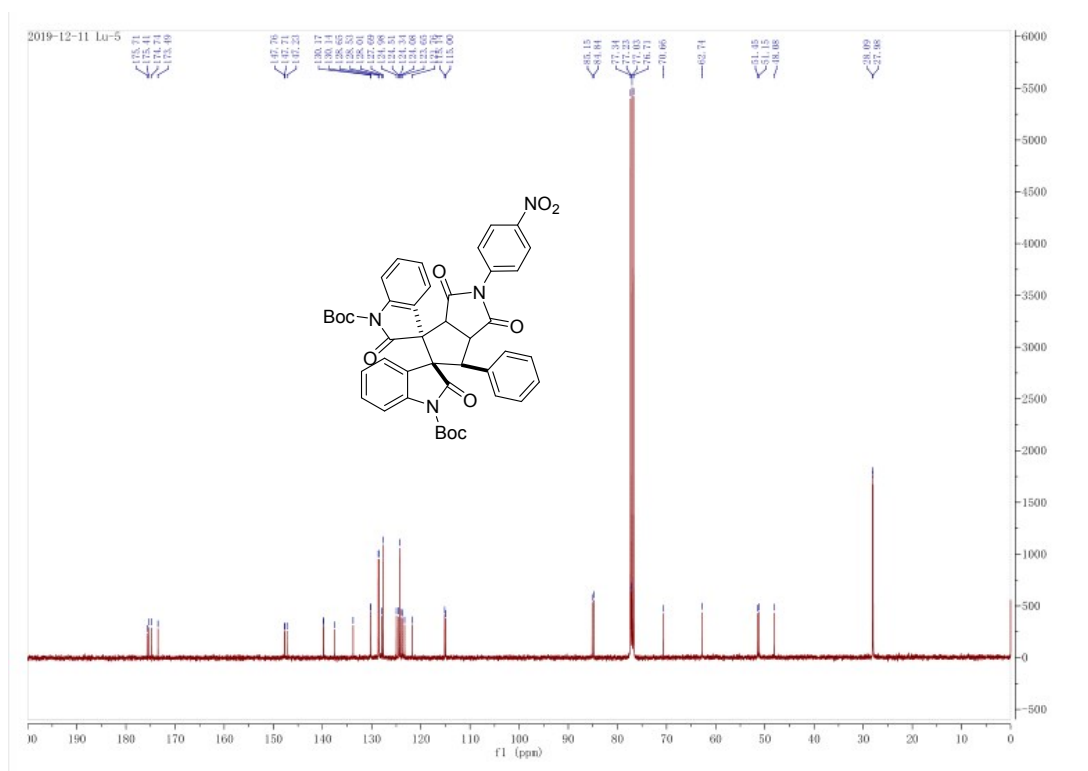





# Compound 4

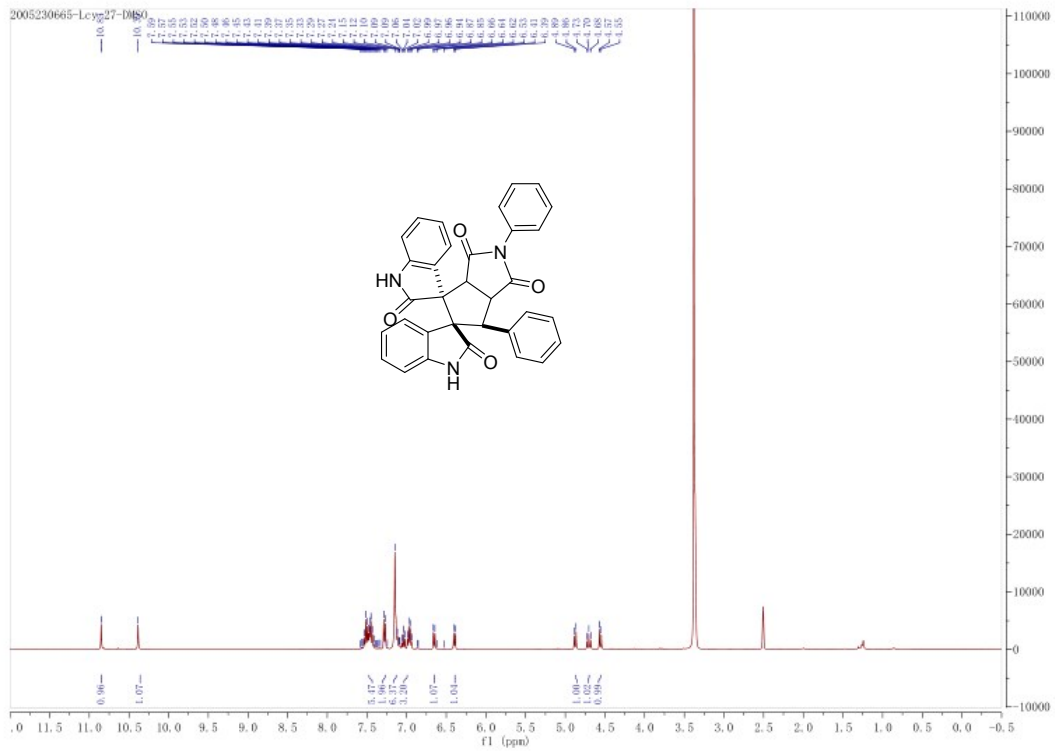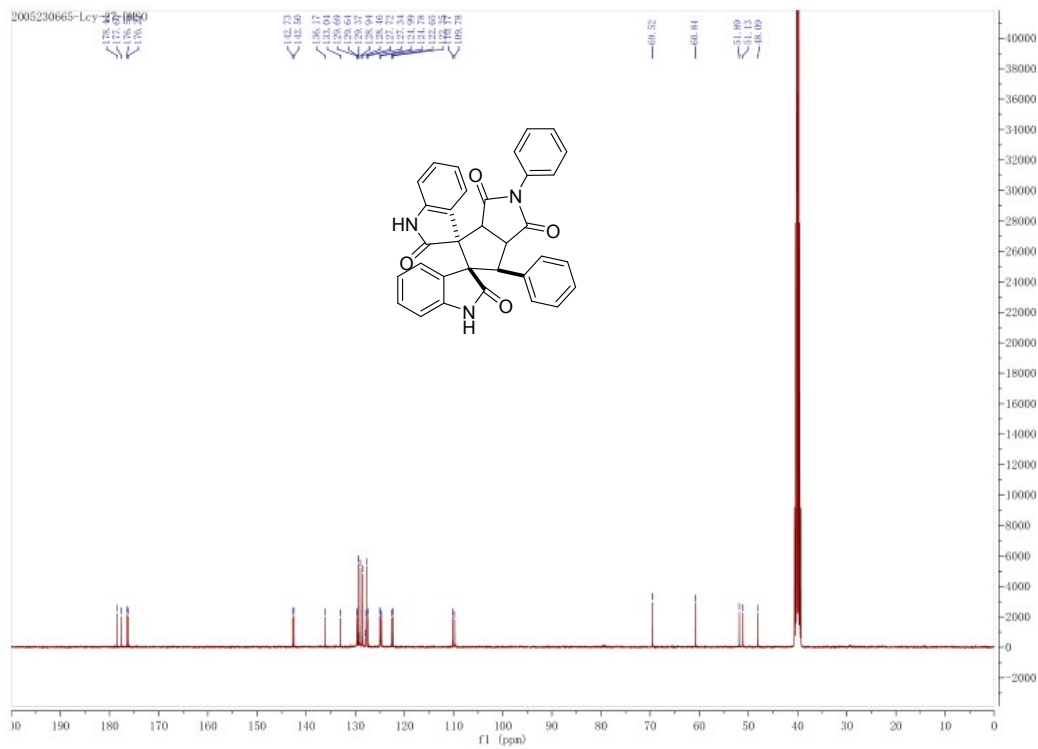

Supplement: d0ob01858a1.pdf [file d0ob01858a1.pdf]
